## 27 **Abstract**

28 Intracellular chloride ion ( $[Cl^-]_i$ ) homeostasis is critical for synaptic neurotransmission yet variations in  
29 subcellular domains are poorly understood owing to difficulties in obtaining quantitative, high-resolution  
30 measurements of dendritic  $[Cl^-]_i$ . We combined whole-cell patch clamp electrophysiology with  
31 simultaneous fluorescence lifetime imaging (FLIM) of the  $Cl^-$  dye MQAE to quantitatively map dendritic  
32  $Cl^-$  levels in normal or pathological conditions. FLIM-based  $[Cl^-]_i$  estimates were corroborated by Rubi-  
33 GABA uncaging to measured  $E_{GABA}$ . Low baseline  $[Cl^-]_i$  in dendrites required  $Cl^-$  efflux via the  $K^+-Cl^-$   
34 cotransporter KCC2 (*SLC12A5*). In contrast, pathological NMDA application generated spatially  
35 heterogeneous subdomains of high  $[Cl^-]_i$  that created dendritic blebs, a signature of ischemic stroke.  
36 These discrete regions of high  $[Cl^-]_i$  were caused by reversed KCC2 transport. Therefore monitoring  $[Cl^-$   
37  $]_i$  microdomains with a new high resolution FLIM-based technique identified novel roles for KCC2-  
38 dependent chloride transport to generate dendritic microdomains with implications for disease.

## 39 **Introduction**

40 Neuronal function is intrinsically tuned by regulation of the intracellular  $Cl^-$   
41 concentration ( $[Cl^-]_i$ ) which is critical for early brain development, setting membrane  
42 excitability, and cell volume regulation (Doyon et al., 2016; Kaila et al., 2014; Rungta et al.,  
43 2015). In mature nerve cells, low  $[Cl^-]_i$  is maintained by  $K^+-Cl^-$  cotransporter (KCC2)-dependent  
44 extrusion to set gamma aminobutyric acid (GABA)ergic inhibitory tone (Cordero-Erausquin et  
45 al., 2005; Kahle et al., 2013; Staley and Proctor, 1999). KCC2 is expressed throughout the  
46 dendritic arbor in hippocampal and cortical pyramidal neurons (Gauvain et al., 2011; Gulyas et  
47 al., 2001) and is highly expressed in synaptic regions in close proximity to N-methyl-D-aspartate  
48 (NMDA), GABA, and  $\alpha$ -amino-3-hydroxy-5-methyl-4-isoxazolepropionic acid (AMPA)  
49 receptors to shape local excitatory/inhibitory potentials via shunting- and feedback-inhibition, and

50 ionic plasticity (Chevy et al., 2015; Doyon et al., 2016; Garand et al., 2019; Gauvain et al.,  
51 2011). It is becoming clear that  $[Cl^-]_i$  heterogeneity in neuronal subdomains is a key determinant  
52 of regional neurotransmission [(Barker and Ransom, 1978; Berglund et al., 2006; Glykys et al.,  
53 2014; Khirug et al., 2008; Kuner and Augustine, 2000), but also that local perturbations in  $[Cl^-]_i$   
54 may underlie synaptic dysfunction. For instance, KCC2 dysregulation has been implicated in  
55 multiple neurological disorders that involve synaptodendritic disinhibition, including epilepsy,  
56 neuropathic pain, schizophrenia, and autism (Cohen et al., 2002; Coull et al., 2003; Hyde et al.,  
57 2011; Steffensen et al., 2015; Tao et al., 2012). However, the spatial distribution and magnitude  
58 of dendritic  $[Cl^-]_i$  changes in these diseases are poorly understood due to a lack of quantitative  
59 imaging of  $[Cl^-]_i$  dynamics at the subcellular level.

60         The dynamic nature of  $Cl^-$  homeostasis makes it challenging to study using conventional  
61 electrophysiology or imaging techniques. Manipulating  $[Cl^-]_i$  by whole-cell patch dialysis is  
62 difficult due to compensatory KCC2 or NKCC1 transport to re-establish physiological  $[Cl^-]_i$   
63 (Cordero-Erausquin et al., 2005; Doyon et al., 2016). Imaging genetically encoded fluorescent  
64 proteins like Clomeleons (Berglund et al., 2006; Grimley et al., 2013; Kuner and Augustine,  
65 2000) and  $Cl^-/H^+$  sensors (Mukhtarov et al., 2013; Sulis Sato et al., 2017) use ratiometric  
66 intensity emissions that are marred by divergent light scattering that is wavelength-, tissue depth-  
67 , and age-dependent (Oheim et al., 2001). These probes are also sensitive to pH (Arosio et al.,  
68 2007; Tsien, 1998), which is problematic given the interrelationship between  $Cl^-$  and  $HCO_3^-$   
69 cotransport (Kaila, 1994) and their joint permeabilities through many  $Cl^-$  channels (Bormann et  
70 al., 1987; Jun et al., 2016).

71         We adopted a Fluorescence Lifetime Imaging (FLIM)-based strategy to circumvent the  
72 limitations of ratiometric sensors and establish whether  $[Cl^-]_i$  microdomains could be imaged.

73 FLIM is insensitive to changes in dye concentration, light scattering, and photobleaching (Chen  
74 et al., 2013; Lloyd et al., 2010), making it ideal for quantifying  $[Cl^-]_i$ . The  $Cl^-$  sensor N-  
75 (ethoxycarbonylmethyl)-6-methoxyquinolinium bromide (MQAE) is suitable for FLIM with a  
76 broad dynamic range of lifetimes and is insensitive to pH (Gensch et al., 2015; Kaneko et al.,  
77 2002). Bulk-loaded MQAE has been used for quantitative  $Cl^-$  imaging *in situ* in Bergmann glia,  
78 dorsal root ganglion- and somatosensory neurons (Funk et al., 2008; Gilbert et al., 2007; Untiet  
79 et al., 2017), and in large dendritic knobs of the vomeronasal organ (Kaneko et al., 2004; Untiet  
80 et al., 2016). However, neurons bulk-loaded with MQAE have poor signal-to-noise over  
81 background staining, making it difficult to measure  $[Cl^-]_i$  with synaptic resolution.

82         Here, we explored the utility of combining MQAE-FLIM with whole-cell patch clamp  
83 electrophysiology to measure dynamic variations in dendritic  $[Cl^-]_i$  and the spatial distributions  
84 of these changes under both physiological and pathological conditions. We show MQAE-FLIM  
85 can accurately quantify  $[Cl^-]_i$  subdomains in dendrites, and that basal  $[Cl^-]_i$  is maintained even  
86 when experimentally challenged with elevated  $Cl^-$  loads. Using MQAE-FLIM, we quantified the  
87 relative contributions of KCC2 and NKCC1 in setting regional  $Cl^-$  electrochemical gradients,  
88 which we corroborated using Rubi-GABA uncaging to calculate  $E_{GABA}$  (Rial Verde et al., 2008).  
89 Lastly, we demonstrate that NMDA can generate localized dendritic microdomains with regions  
90 of remarkably high and persistent dendritic  $[Cl^-]_i$  gradients. The formation of dendritic  
91 microdomains leads to the appearance of dendritic varicosities (“blebbing”) a hallmark of  
92 dendritic pathology. Remarkably, bleb formation was prevented by furosemide, indicating  
93 localized  $Cl^-$  loading was due to reversed  $K^+/Cl^-$  transport. Together, our work highlights the  
94 advantages of MQAE-FLIM to measure  $[Cl^-]_i$  shifts with sub-micrometer resolution that would  
95 be otherwise undetectable using intensity imaging or electrophysiology alone. Additionally, we

96 have identified a novel role for KCC2 in dendritic microdomain  $\text{Cl}^-$  homeostasis that critically  
97 impacts neuronal structure and function.

98

## 99 **Results**

### 100 **MQAE-FLIM calibrations for determination of $[\text{Cl}^-]_i$**

101 As a first step we determined the reliability of MQAE-FLIM to report  $[\text{Cl}^-]_i$  by  
102 calibrating the dye *in situ* (in bulk-loaded cells) and *in vitro* (in recording solution in sealed  
103 pipettes) by time-correlated single-photon counting using 2-photon microscopy (Fig 1a). *In situ*  
104 calibrations were conducted in acute brain slices bulk-loaded with MQAE using nigericin and  
105 tributyltin to equilibrate  $[\text{Cl}^-]_i = [\text{Cl}^-]_o$  across neuronal membranes (Gensch et al., 2015;  
106 Kovalchuk and Garaschuk, 2012). We then measured MQAE-FLIM lifetimes corresponding to  
107 various  $\text{Cl}^-$  concentrations (henceforth *MQAE- $[\text{Cl}^-]_i$* , Fig 1b,c) in parallel to intensity changes.  
108 Bulk-loaded MQAE intensity decreased significantly in response to increasing  $[\text{Cl}^-]_o$  but we also  
109 observed progressive decline over time due to a combination of dye loss and photobleaching (Fig  
110 1a,c). Indeed, intensity changes did not reverse in  $0[\text{Cl}^-]_o$  to wash out  $\text{Cl}^-$  (Fig 1d). In contrast,  
111 the MQAE-FLIM channel revealed discrete lifetime changes in response to increasing  $[\text{Cl}^-]_o$  that  
112 fully recovered in  $0[\text{Cl}^-]_o$  washout despite the reduction in intensity signal (Fig 1d,e),  
113 highlighting the advantage and utility of FLIM in overcoming intensity artifacts arising from  
114 changes in dye concentration.

115 To combine MQAE-FLIM with whole-cell patch clamp, we conducted an additional *in*  
116 *vitro* calibration to complement and compare with the bulk-loaded *in situ* calibration. Whole cell

117 loading provided improved signal to noise in dendritic compartments but it was important to  
118 calibrate MQAE in the electrode solution that included HEPES and gluconate (Kaneko et al.,  
119 2002). MQAE was dissolved in a K-gluconate recording solution with varied  $\text{Cl}^-$  concentrations,  
120 and MQAE-FLIM readouts were measured in sealed, temperature-controlled pipettes.  $\text{Cl}^-$ -  
121 dependent MQAE lifetimes varied over a broad dynamic range, from  $\sim 4.1$  ns to  $\sim 1.2$  ns when  
122  $[\text{Cl}^-]_{\text{pipette}}$  was increased from 2.5 mM to 110 mM, respectively (Fig 1f-h). The calibration data  
123 were well-fit ( $R^2 = 0.992$ ) to a single exponential decay curve with a calculated  $K_d = 23.78$  mM  
124  $[\text{Cl}^-]$  that should be suitable to capture physiological to pathological variations in  $[\text{Cl}^-]_i$  (Fig 1h).  
125 The reciprocal of the dataset from Fig 1h correlated with a linear regression analysis (Fig 1i),  
126 confirming that MQAE works through collisional  $\text{Cl}^-$  quenching and therefore should not buffer  
127  $\text{Cl}^-$  in solution (Verkman et al., 1989). As expected, the  $\text{Cl}^-$  sensitivity of MQAE differed in *in*  
128 *situ* and *in vitro* calibration environments (Stern-Volmer constants,  $K_{SV} = 6.53 \text{ M}^{-1}$  and  $20.19 \text{ M}^{-1}$ ,  
129 respectively, Fig 1j), and the coefficient of variance was significantly lower in the *in vitro*  
130 setting (Fig 1k).

131

132

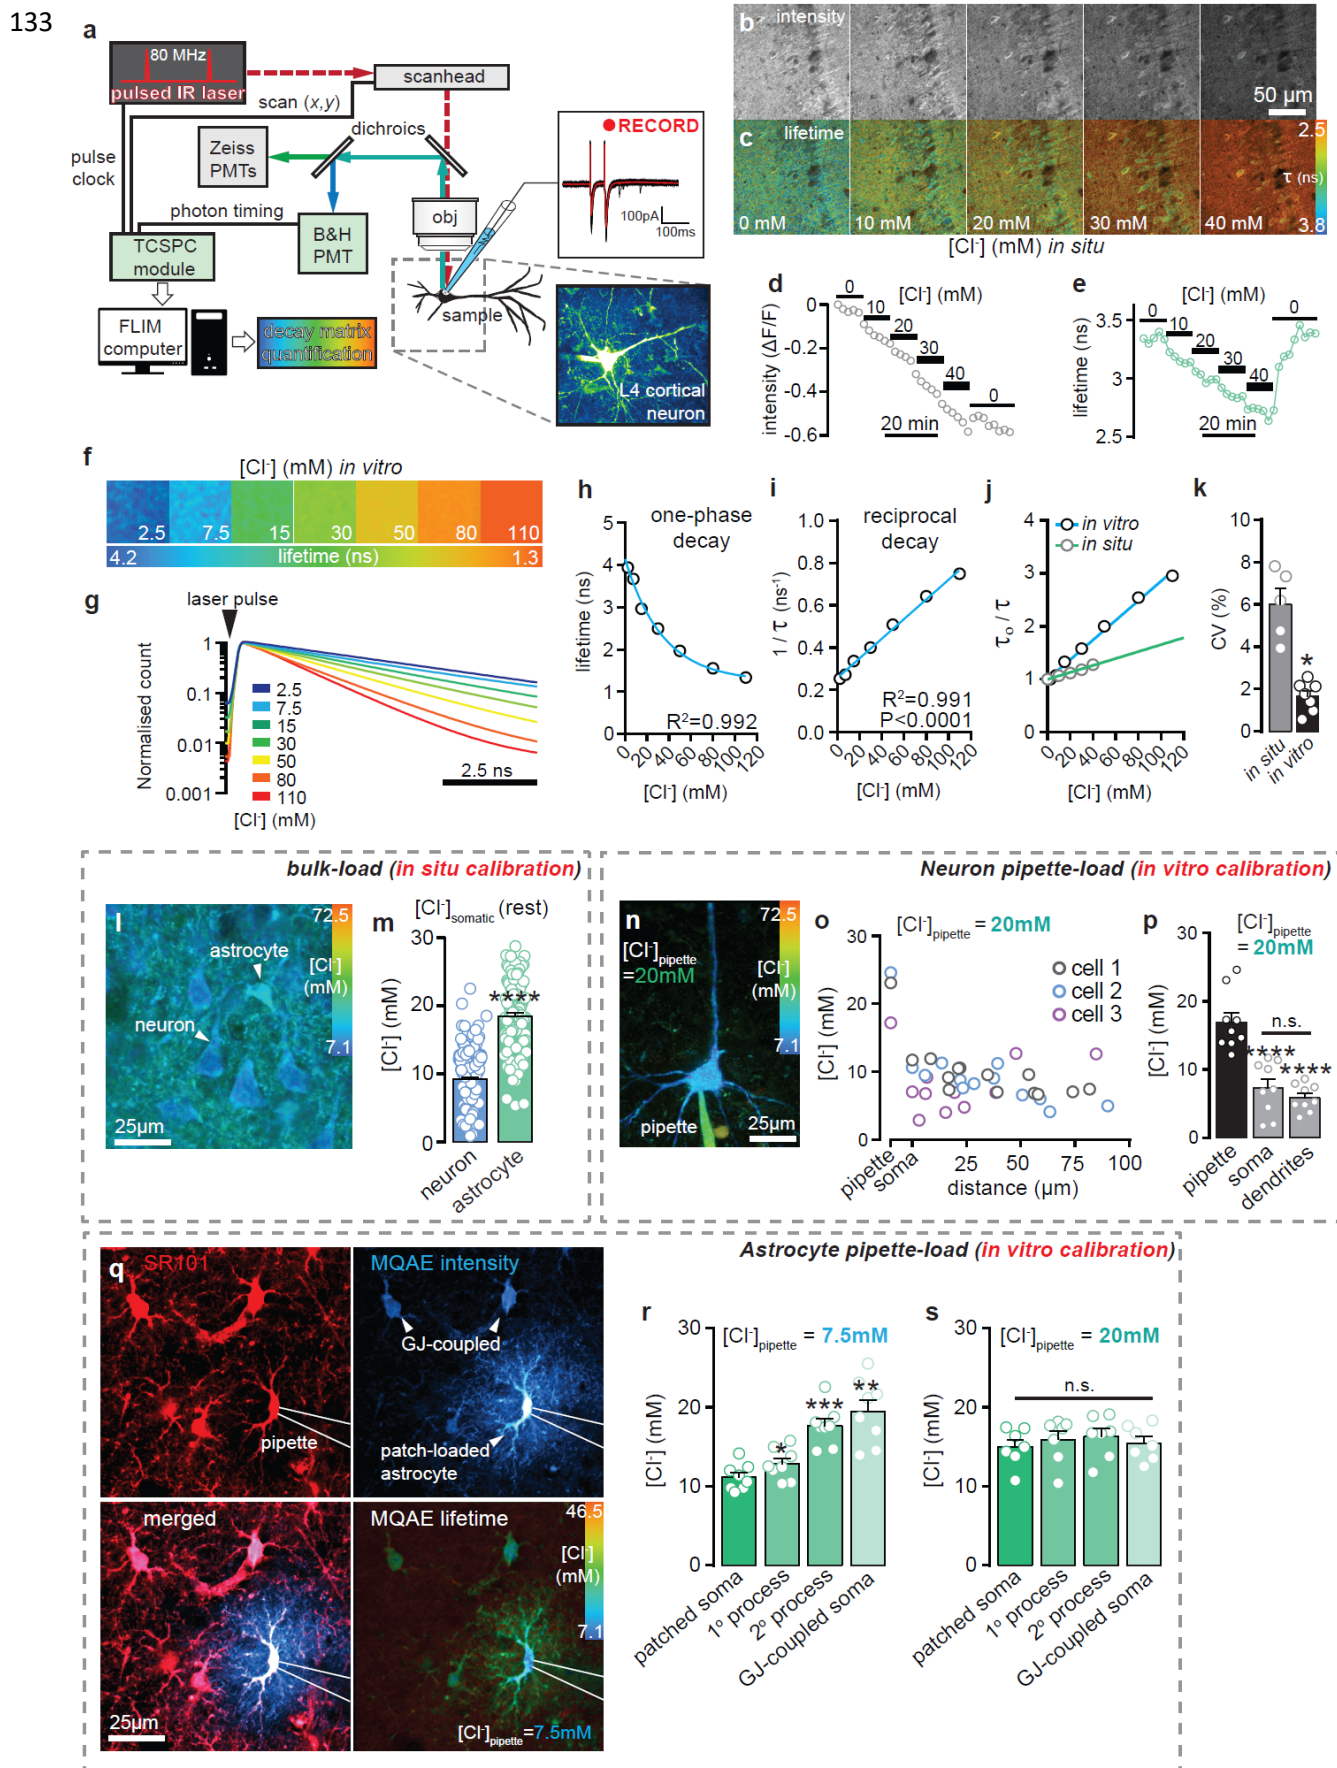

134 **Figure 1. Fluorescence Lifetime Imaging reveals distinct Cl<sup>-</sup> handling in neurons and**  
135 **astrocytes. a)** Schematic of the time-correlated single photon counting FLIM setup pairing 2P  
136 laser imaging system with a Becker & Hickl SPC FLIM module and whole-cell patch clamp  
137 electrophysiology. **b)** MQAE-intensity image series of CA1 hippocampal neurons in the  
138 presence of nigericin and tributyltin to equilibrate [Cl<sup>-</sup>]<sub>o</sub>: [Cl<sup>-</sup>]<sub>i</sub> across plasma membranes. [Cl<sup>-</sup>]<sub>o</sub>  
139 was sequentially increased to alter [Cl<sup>-</sup>]<sub>i</sub> and therefore MQAE-intensity. **c)** MQAE-FLIM  
140 readouts from images in ‘b’. **d)** Intensity measures from CA1 neuronal somata when [Cl<sup>-</sup>]<sub>o</sub> is  
141 manipulated from 0 to 40 mM. Note that the signal does not reach steady state, nor does it  
142 recover to baseline upon washout. **e)** Corresponding MQAE-[Cl<sup>-</sup>]<sub>i</sub> values for intensity  
143 measurements in ‘d’. Note that MQAE-FLIM signals reach steady state and that the Cl<sup>-</sup> washout  
144 is quantifiable. **f)** Example FLIM images of *in vitro* MQAE calibration. **g)** Normalized MQAE  
145 lifetime curves at varying [Cl<sup>-</sup>]. **h)** MQAE-FLIM calibration data fit to a one-phase exponential  
146 decay curve consistent with a collisional quenching model. **i)** The reciprocal of the curve in ‘d’  
147 confirms a linear relationship. **j)** KSV plots comparing calibrations obtained *in vitro* (in bulk-  
148 loaded cells) and *in vitro* (in sealed pipettes). **k)** Coefficient of variance (CV) plots comparing *in*  
149 *vitro* and *in situ* calibration data shows that the variability of lifetime readouts is lower *in vitro*  
150 (P<0.05, student’s t-test). **l)** Exemplar image of layer 4 cortical neurons and an astrocyte bulk  
151 loaded with MQAE. **m)** Mean somatic [Cl<sup>-</sup>]<sub>i</sub> measurements with MQAE-FLIM reveal  
152 significantly higher basal [Cl<sup>-</sup>]<sub>i</sub> in astrocytes (n=111 cells) compared to neurons (n=197  
153 cells)(slices=6, \*\*\*\*P<0.0001, student’s t-test). **n)** Z-projection MQAE-FLIM image of layer 4  
154 pyramidal neuron patch clamped with MQAE (6 mM) and set [Cl<sup>-</sup>]<sub>i</sub> (20 mM) in the pipette. **o)**  
155 Quantification of [Cl<sup>-</sup>]<sub>i</sub> plotted vs distance from the soma for three example cells to measure the  
156 precipitous drop in [Cl<sup>-</sup>]<sub>i</sub> from the pipette to distal dendrites. **p)** Comparison of average [Cl<sup>-</sup>]<sub>i</sub>  
157 readouts of all cells patched with [Cl<sup>-</sup>]<sub>pipette</sub> = 20 mM (n=9 cells, \*\*\*\*P<0.0001, one-way  
158 ANOVA with Tukey test). **q)** Astrocytes identified by SR101 staining (top left) were patch  
159 clamped and dialysed with MQAE (top right) 7.5 mM Cl<sup>-</sup>. MQAE signal was detected in gap-  
160 junctionally (GJ) coupled astrocytes. **r)** Average MQAE-FLIM measurements comparing  
161 somatic [Cl<sup>-</sup>]<sub>i</sub> to 1<sup>o</sup> and 2<sup>o</sup> processes (\*P = 0.0171 and \*\*\*P = 0.0002, respectively), as well as to  
162 somatic ROIs from GJ-coupled astrocytes (\*\*P = 0.0042) when [Cl<sup>-</sup>]<sub>pipette</sub> = 7.5 mM (n= 8 slices,  
163 data compared to patched soma as a control, one-way ANOVA with Tukey test). **s)** Average  
164 MQAE-FLIM comparisons when [Cl<sup>-</sup>]<sub>pipette</sub> = 20 mM (n= 7 slices, P>0.05, one-way ANOVA  
165 with Tukey test).

166

167

168



169  
170  
171  
172

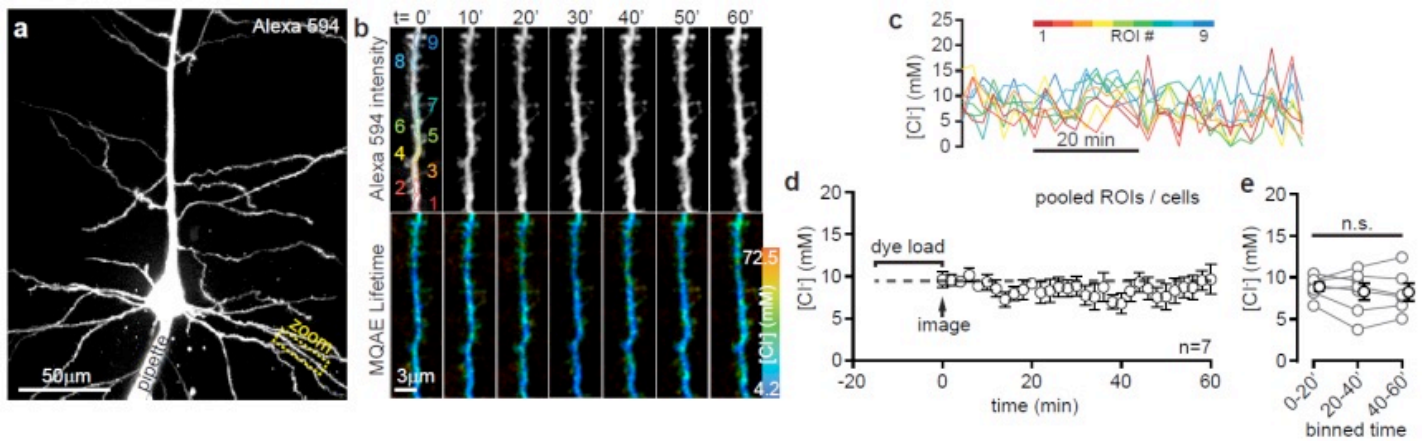

173

174 **Supplemental Figure 1. MQAE-[Cl<sup>-</sup>]<sub>i</sub> readouts are stable in dendrites.** a) Maximum intensity  
175 projection z-stack image of a cortical neuron patch-loaded with Alexa594 (presented emission)  
176 and MQAE. Dashed yellow box denotes basal dendrite imaged in 'b' and 'c'. b) Sample Alexa  
177 594 intensity (top panels) and MQAE-FLIM (bottom panels) image series to monitor dendritic  
178 morphology and maintain a stable focal plane for MQAE-FLIM. Intensity channel was used to  
179 map ROIs for MQAE-FLIM analysis. c) Color-coded MQAE-[Cl<sup>-</sup>]<sub>i</sub> traces from dendrite in 'b'.  
180 d) Average dendritic [Cl<sup>-</sup>]<sub>i</sub> over time following a 15 min dye load period. Dendritic [Cl<sup>-</sup>]<sub>i</sub> was  
181 stable over the course of 60 min imaging sessions (n=7 cells). e) Quantification of dendritic [Cl<sup>-</sup>]  
182 ]<sub>i</sub> in 20 min intervals. No net change in [Cl<sup>-</sup>]<sub>i</sub> was observed (P>0.05, Tukey's test on one-way  
183 ANOVA), suggesting the relative impact of changes to the cytosolic microenvironment on  
184 MQAE-FLIM are negligible.

185

186

187

188

189

190 **Bulk- and patch-loaded cells report expected  $[Cl^-]_i$  with MQAE-FLIM**

191 Resting  $[Cl^-]_i$  is reported to range from 6 mM to 13 mM in mature neurons (Delpire and  
192 Staley, 2014; Kuner and Augustine, 2000; Staley and Proctor, 1999). We sought to confirm that  
193 MQAE-FLIM measures of neuronal  $[Cl^-]_i$  matched basal values reported in these previous  
194 studies. In neurons bulk loaded with MQAE, mean resting  $MQAE-[Cl^-]_i$  was calculated to be  
195  $9.22 \pm 0.3$  mM  $[Cl^-]_i$  in the soma (perinuclear regions of interest [ROI]s) using *in situ* calibration  
196 values (Fig 1l,m).  $[Cl^-]_i$  was significantly higher in astrocytes ( $18.48 \pm 0.5$  mM) visually  
197 identified by cell morphology or by co-staining with SR101 (Fig 1l,m), closely matching  
198 measurements in cell culture (Gensch et al., 2015).

199 Next, we dialyzed MQAE by whole-cell patch clamp to compare MQAE-FLIM measures  
200 using *in vitro* calibration data in the soma and dendrites. Layer 4/5 cortical neurons were patch  
201 clamped with  $[Cl^-]_{\text{pipette}} = 20$  mM, a commonly used concentration with Ag/AgCl electrodes, and  
202  $[Cl^-]_i$  was measured at several distance intervals distal to the soma (Fig 1n,o). By calculating  
203  $MQAE-[Cl^-]_i$  with *in vitro* calibration values, we observed that somatic  $[Cl^-]_i$  was consistently  
204 lower than the 20 mM  $[Cl^-]_{\text{pipette}}$  and that the lower  $MQAE-[Cl^-]_i$  readouts were stable throughout  
205 the proximal and distal dendrites (Fig 1n,o). Cellular  $[Cl^-]_i$  in patched neurons closely matched  
206 measures from *in situ* bulk loading experiments (from Fig 1l,m), suggesting both methods  
207 accurately report resting  $[Cl^-]_i$  levels (Fig 1p). As an important control, dendritic MQAE-FLIM  
208 readouts were stable over 1 hr (SFig 1), suggesting  $MQAE-[Cl^-]_i$  measures are minimally  
209 affected by spatiotemporal variations of dye or dialysis of HEPES or gluconate from the pipette.

210 The precipitous drop from  $[Cl^-]_{\text{pipette}}$  to somatic  $[Cl^-]_i$  could be due to: (1) homeostatic  $Cl^-$   
211 efflux by  $K^+-Cl^-$  cotransport, or (2) unpredictable interactions between MQAE and the cytosolic  
212 microenvironment. The latter case assumes  $[Cl^-]_i$  closely matches  $[Cl^-]_{\text{pipette}}$  (20 mM) and that  
213 the measured  $MQAE-[Cl^-]_i$  is artifactually altered by nonspecific anion quenching. We explored  
214 these possibilities by patch loading MQAE in astrocytes, which do not express KCC2 (Williams  
215 et al., 1999) and their  $[Cl^-]_i$  is reported to range from 20-40 mM (Gensch et al., 2015; Untiet et  
216 al., 2017). Patched astrocytes were dialyzed with a  $[Cl^-]_{\text{pipette}}$  concentration much lower than our  
217 *in situ* measure for astrocyte  $[Cl^-]_i$  but closer to neuronal  $[Cl^-]_i$  (7.5 mM). If hypothesis (1) was  
218 correct then homeostatic  $Cl^-$  import would increase  $[Cl^-]_i$  to ~18 mM (Fig 1l) due to high glial  
219 expression of NKCC1 (Su et al., 2002; Untiet et al., 2017). Somatic  $MQAE-[Cl^-]_i$  in patched  
220 astrocytes was higher ( $11.16 \pm 0.6$  mM) than  $[Cl^-]_{\text{pipette}}$ , consistent with the observation that  
221 astrocytes maintain a higher  $[Cl^-]_i$  than neurons (Fig 1q,r)(Kettenmann and Schachner, 1985;  
222 MacVicar et al., 1989; Untiet et al., 2017). Distal measures revealed a progressive increase in  
223  $[Cl^-]_i$  in large primary- (1<sup>o</sup>) to smaller secondary (2<sup>o</sup>) processes of patched astrocytes, with peak  
224 measures from astrocyte somata coupled via gap-junctions (GJ)( $19.46 \pm 1.46$  mM, Fig 1r). In  
225 contrast, we observed a slight but reliable decrease in  $[Cl^-]_i$  across all ROIs (Fig 1s) in astrocytes  
226 loaded with  $[Cl^-]_{\text{pipette}} = 20$  mM, consistent with an homeostatic decrease by KCC3 (Cordero-  
227 Erasquin et al., 2005; Doyon et al., 2016).

## 228 **Mapping subcellular KCC2 $Cl^-$ export during intracellular $Cl^-$ challenge**

229 The extent of homeostatic  $Cl^-$  export via KCC2 was quantified using MQAE-FLIM by  
230 applying the inhibitor furosemide in neurons that were dialyzed with a high  $Cl^-$  load via the  
231 patch pipette ( $[Cl^-]_{\text{pipette}} = 80$  mM, normal aCSF  $[Cl^-]_o = 136$  mM). Under these conditions  
232  $MQAE-[Cl^-]_i$  was stable (somatic change =  $2.74 \pm 1.25$  mM) after 15 min of dye loading (Fig

233 2ab), suggesting that MQAE diffusion was in stable equilibrium and that its lifetime is not  
234 appreciably impacted by hydrolysis (Koncz and Daugirdas, 1994). We again observed a marked  
235 decrease in somatic  $MQAE-[Cl^-]_i$  compared to  $MQAE-[Cl^-]_{pipette}$  (Fig 3ac) with gradual, distance-  
236 dependent reductions in dendrites suggesting substantial  $Cl^-$  efflux throughout the dendritic tree.  
237 Bath application of furosemide (200  $\mu M$ ) significantly increased dendritic  $[Cl^-]_i$  at binned ROIs  
238 equidistant to the soma (Fig 2c-e), indicating that the low dendritic  $[Cl^-]_i$  required KCC2.  
239 Applying furosemide together with picrotoxin to inhibit  $GABA_A$ -receptors similarly increased  
240  $[Cl^-]_i$  by blocking tonic  $Cl^-$  efflux from  $GABA_A$ R when  $E_{Cl^-}$  is depolarized from holding  
241 potential ( $V_m = -60$  mV) (Fig 2d,e). Interestingly,  $[Cl^-]_i$  was significantly lower in 2° versus 1°  
242 dendrites (Fig 2f), consistent with the observation that KCC2 is evenly distributed in dendrites  
243 and therefore  $Cl^-$  handling should be more efficient where the surface area to volume ratio is  
244 high (Doyon et al., 2011). These data suggest neurons defend their  $Cl^-$  gradients by KCC2-  
245 transport.

246 KCC2 transport activity is highly regulated by kinase-dependent phosphorylation via the  
247 With No-Lysine (K) (WNK) and Ste20p-related Proline Alanine-rich Kinases (SPAK) (Alessi et  
248 al., 2014). Phosphorylation or dephosphorylation of threonines (T) T906 and T1007 on the  
249 KCC2 c-terminus cause transporter hypo- or hyperfunction, respectively (Friedel et al., 2015;  
250 Kahle et al., 2013; Rinehart et al., 2009). To further explore KCC2's role in establishing  $Cl^-$   
251 gradients, we repeated the above experiments in knock-in mice in which T906 and T1007 were  
252 mutated to alanine (A) (i.e., T906A and T1007A, henceforth “KCC2<sup>A/A</sup>”) to mimic KCC2  
253 dephosphorylation and constitutive activation (Friedel et al., 2015; Heubl et al., 2017; Moore et  
254 al., 2018; Pisella et al., 2019; Watanabe et al., 2019). We observed a sharp drop in somato-  
255 dendritic  $MQAE-[Cl^-]_i$  in patched KCC2<sup>A/A</sup> neurons compared to wild-type controls (KCC2<sup>WT</sup>),

256 consistent with an increased pump capacity of  $KCC2^{A/A}$  (Fig 2g). Additionally, we found no  
257 difference in equidistant  $[Cl^-]_i$  measures between pyramidal neurons in brain slices from control  
258 rat versus mouse ( $KCC2^{WT}$ ) (control and  $KCC2^{WT}$  groups from Fig 2e,g, respectively,  $P > 0.05$   
259 by two-way ANOVA). This similarity suggests that the  $KCC2$  extrusion capacity is consistent  
260 between these species. We conclude that  $MQAE$ -FLIM can detect dynamic fluctuations in  $[Cl^-]_i$   
261 through manipulation of  $KCC2$  activity, and that discrepancy between  $MQAE$ - $[Cl^-]_i$  and  $MQAE$ -  
262  $[Cl^-]_{pipette}$  is primarily due to homeostatic  $Cl^-$  extrusion.

263         If the  $MQAE$ - $[Cl^-]_{pipette}$ : $MQAE$ - $[Cl^-]_i$  mismatch was due to the cytosolic environment,  
264 somatic  $[Cl^-]_i$  readouts from Fig 2 would be closer to 80 mM instead of the recorded ~30-40  
265 mM, and true  $[Cl^-]_i$  would be close to a ceiling and likely not amenable to increase. We tested  
266 whether  $MQAE$ - $[Cl^-]_i$  in these conditions could be increased to match  $[Cl^-]_{pipette}$  by  
267 experimentally inhibiting  $Cl^-$  fluxes. Neurons were voltage clamped at the calculated  $E_{Cl^-}$  for  $[Cl^-]$   
268  $]_{pipette} = 80$  mM ( $E_{Cl^-} = -14$  mV), and a cocktail of blockers was applied to inhibit  $Cl^-$  fluxes,  
269 including: picrotoxin ( $GABA_A$ R), furosemide, bumetanide ( $NKCC1$ ), niflumic acid (NFA,  $Ca^{2+}$ -  
270 activated  $Cl^-$  channels), and 5-Nitro-2-(3-phenylpropylamino)benzoic acid (NPPB, VRACs).  
271 Under these conditions, somatic  $[Cl^-]_i$  steadily increased from  $36.83 \pm 2.1$  mM at break-in to a  
272 plateau of  $64.11 \pm 1.8$  mM over 20 min (Fig 3a-c). This was accompanied by a volume increase  
273 (as evidenced by the increase in mean cross sectional area = 34.8%, Fig 3a,b,d) because  $Cl^-$   
274 loading is a key driver of swelling (Rothman, 1985; Rungta et al., 2015). Together, these data  
275 refute hypothesis (2) and suggest that  $MQAE$ - $[Cl^-]_i$  readouts can be used to quantify  $Cl^-$  dynamics  
276 via transporter export and efflux through  $Cl^-$  channels.

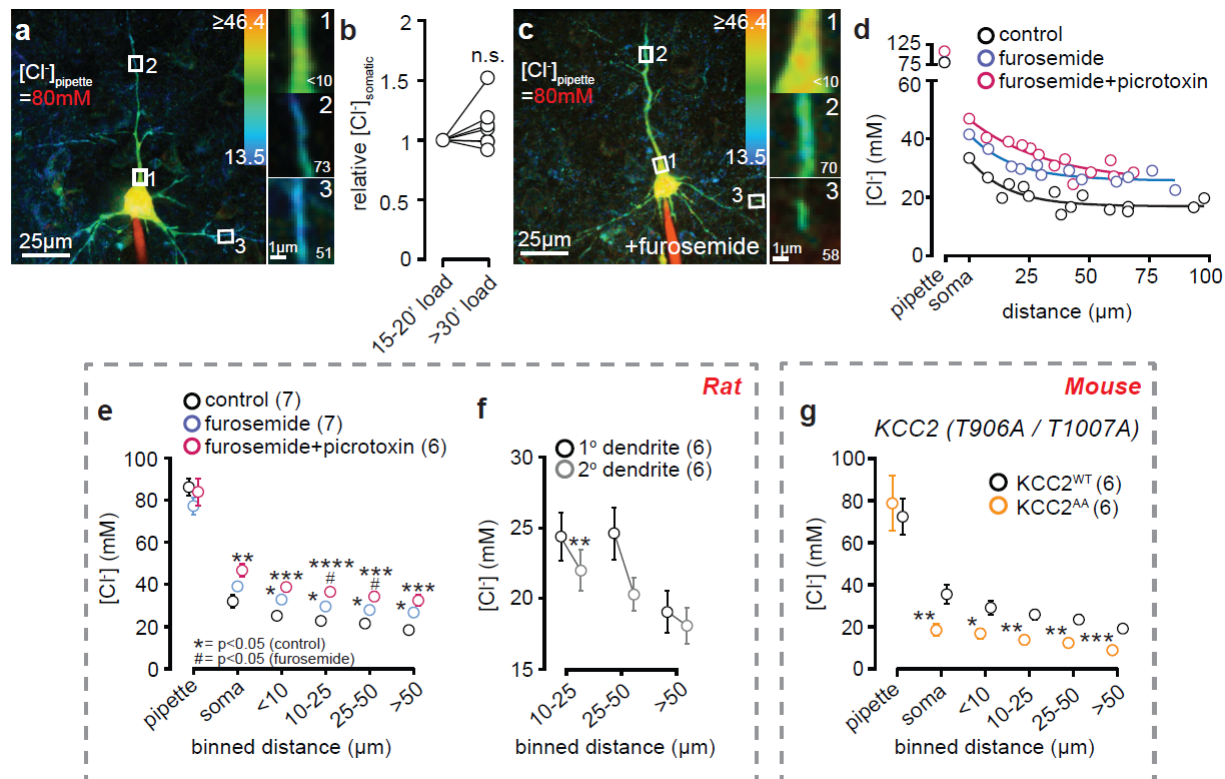

277  
278  
279  
280  
281  
282  
283  
284  
285  
286  
287  
288  
289  
290  
291  
292  
293  
294  
295  
296  
297  
298  
299

**Figure 2. KCC2-dependent  $Cl^-$  extrusion during high  $[Cl^-]_i$  challenge.** **a**) Left panel: example maximum intensity projection (collapsed Z-stack) image of layer 4 neuron patch filled with  $[Cl^-]_{\text{pipette}} = 80 \text{ mM}$ , normal ASF  $[Cl^-]_o = 136 \text{ mM}$ , voltage clamped at  $-60 \text{ mV}$ . Right panels: zoomed ROIs from primary (panels 1&2) and secondary (panel 3) dendrites at different distances from the soma (in  $\mu\text{m}$ , bottom right values in figure panels). **b**) Quantification of average  $[Cl^-]_i$  measures over time (each point represents whole-cell averages).  $[Cl^-]_i$  stabilized after 15 min post whole-cell break-in, and MQAE-FLIM readouts did not change 30 min post break-in. **c**) Exemplar cell loaded with  $[Cl^-]_{\text{pipette}} = 80 \text{ mM}$  in the presence of KCC2 blocker furosemide ( $200 \mu\text{M}$ ), normal ASF  $[Cl^-]_o = 136 \text{ mM}$ , voltage clamped at  $-60 \text{ mV}$ . Zoom panels show higher steady-state  $[Cl^-]_i$  measured by MQAE-FLIM compared to 'a', suggesting a KCC2-dependent  $Cl^-$  efflux pathway. **d**) Plots of  $[Cl^-]_i$  at varying distances from the soma. Application of furosemide alone, or furosemide+picROTOXIN ( $100 \mu\text{M}$ ) increased steady state  $[Cl^-]_i$  measures by MQAE-FLIM compared to control. **e**) Quantitative summary comparing drug treatments on  $[Cl^-]_i$  at respective distances (\* $P < 0.05$  compared to control, # $P < 0.05$  compared to furosemide). **f**) Comparison of  $[Cl^-]_i$  between primary and secondary dendrites at binned ROIs equidistant from the soma.  $[Cl^-]_i$  measures were relatively lower in  $2^\circ$  vs  $1^\circ$  dendrites at distances of  $10\text{-}25 \mu\text{m}$  (\*\* $P = 0.0062$ ) from the soma, but not at distances  $25\text{-}50 \mu\text{m}$  ( $P = 0.0517$ ) and  $>50 \mu\text{m}$  ( $P = 0.2467$ ), two-tailed paired t-tests. **g**) Quantitative analysis of  $[Cl^-]_i$  by MQAE-FLIM in KCC2<sup>A/A</sup> mice compared to WT controls patch loaded with  $[Cl^-]_{\text{pipette}} = 80 \text{ mM}$ , normal ASF  $[Cl^-]_o = 136 \text{ mM}$ , voltage clamped at  $-60 \text{ mV}$ .  $[Cl^-]_i$  was significantly lower in KCC2<sup>A/A</sup> neurons compared to KCC2<sup>WT</sup> (from left to right,  $P = 0.0082, 0.0161, 0.0014, 0.0012, 0.0006$ ), consistent with an increased extrusion capacity of KCC2.

300

301

302

303

304

305

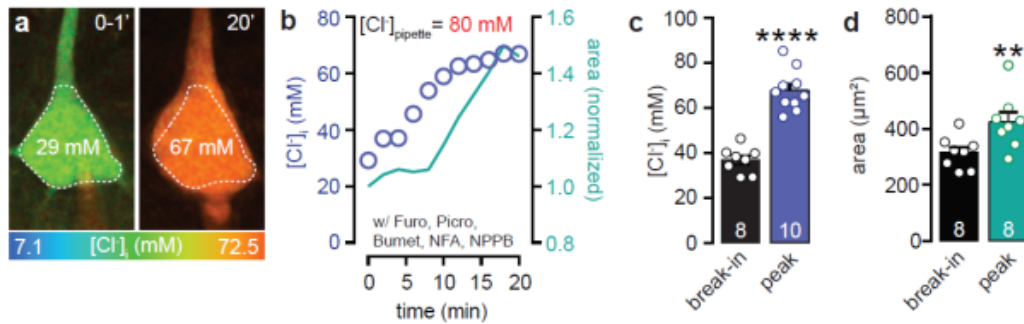

306 **Figure 3. Inhibiting putative routes of Cl<sup>-</sup> efflux leads to dramatic increase in [Cl<sup>-</sup>]<sub>i</sub>. a)**

307 Example MQAE-FLIM images at whole-cell break in (left panel) and 20 min after (right panel)

308 of cell patch clamped with [Cl<sup>-</sup>]<sub>pipette</sub> = 80 mM, normal ASF [Cl<sup>-</sup>]<sub>o</sub> = 136 mM, voltage clamped

309 at -14 mV. Experiment performed with furosemide (200 μM), picrotoxin (100 μM) bumetanide

310 (50 μM), NFA (100 μM), and NPPB (100 μM) in the ACSF. b) Quantification of somatic [Cl<sup>-</sup>]<sub>i</sub>

311 and cross-sectional area over time in 'a'. c) Summary of peak [Cl<sup>-</sup>]<sub>i</sub> measures by MQAE

312 compared to whole-cell break-in (0-1 min)(\*\*\*\*P<0.0001, two-tailed paired t-test). d)

313 Comparison of somatic swelling as measured by cross-sectional area (\*\*P = 0.0018, two-tailed

314 paired t-test).

315

316

### 317 Local GABA uncaging corroborates MQAE lifetime

318 As final confirmation that MQAE-FLIM is accurate, we compared spatially coupled

319 FLIM readouts to E<sub>GABA</sub> measured by local two-photon of uncaging Rubi-GABA (Rial Verde et

320 al., 2008). Rubi-GABA (0.5 mM) was locally applied and photolyzed adjacent to the somatic

321 MQAE-FLIM ROI. In this way we would achieve reasonable voltage clamp in the soma with

322 minimal space clamp artifacts (Fig 4a) (Williams and Mitchell, 2008). These experiments were

323 performed in the absence of the intracellular K<sup>+</sup>-channel blocker Cs<sup>+</sup> to prevent perturbation of

324 KCC2 function (Blaesse et al., 2009; Williams and Payne, 2004). In neurons patched with [Cl<sup>-</sup>

325 ]<sub>pipette</sub>= 80 mM, Rubi-GABA was uncaged at -80 mV to +20 mV and [Cl<sup>-</sup>]<sub>i</sub> was calculated from

326  $E_{GABA}$  ( $E_{GABA}-[Cl^-]_i$ , Fig 4b-d).  $E_{GABA}-[Cl^-]_i$  and  $MQAE-[Cl^-]_i$  values were well correlated (Fig 4f)  
 327 despite known confounds for  $E_{GABA}$  measures such as permeability to  $HCO_3^-$  (Kaila and Voipio,  
 328 1987; Kaila et al., 1993). To test the impact  $Br^-$  efflux (dissociated from MQAE-Br salt) on  
 329  $E_{GABA}$ , we reduced the concentration of MQAE 10-fold and found no statistical difference from 6  
 330 mM MQAE (Fig 4e).

331  
 332  
 333  
 334

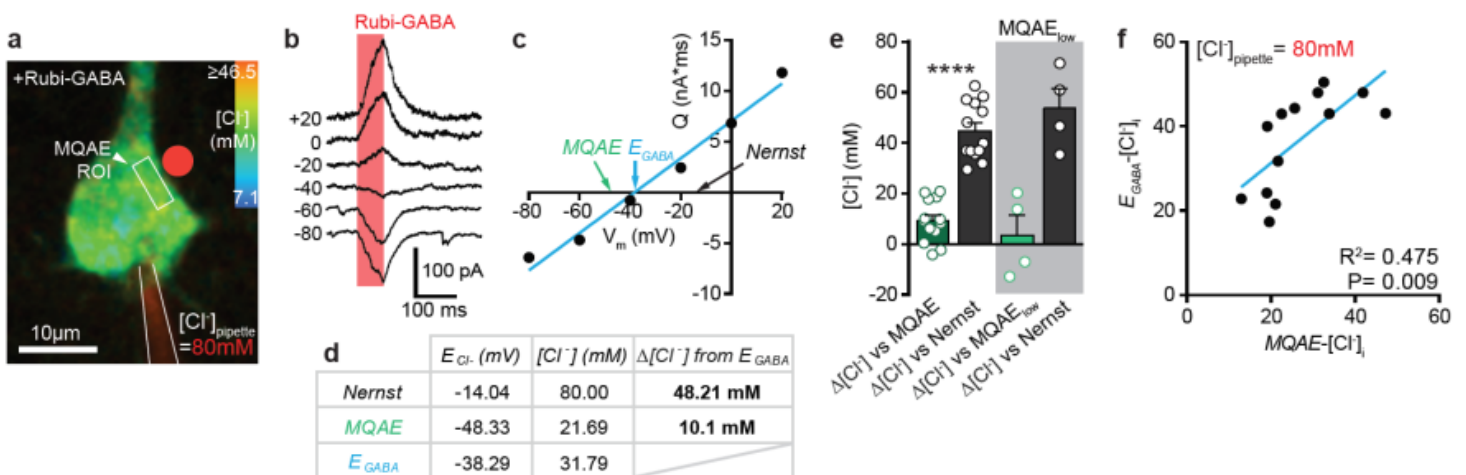

335 **Figure 4. Comparison of MQAE-[Cl]<sub>i</sub> to  $E_{GABA}-[Cl^-]_i$ .** **a)** Example image of layer 4 neuron  
 336 patch-loaded with  $[Cl^-]_{pipette} = 80$  mM, normal ASF  $[Cl^-]_o = 136$  mM. Rubi-GABA was locally  
 337 applied (0.5 mM) by puff electrode and photolyzed adjacent to the soma (red dot) by 2P-  
 338 uncaging. **b)** Example whole-cell currents induced by Rubi-GABA uncaging (red box) at  
 339 different holding potentials. **c)** Charge (Q) and membrane voltage ( $V_m$ ) plot of Rubi-GABA  
 340 responses.  $E_{GABA}$  is graphically compared to  $Cl^-$  reversal calculated by MQAE measurement,  
 341 as well the  $E_{Cl^-}$  estimation that assumes  $[Cl^-]_i = [Cl^-]_{pipette}$  (80 mM). **d)** Tabular results from  
 342 exemplar experiment ‘a-c’ showing the calculated values for  $E_{Cl^-}$  based on the pipette solution  
 343 (Nernst), the MQAE-FLIM measurement, and the  $E_{GABA}$  measurement; the respective predicted  
 344  $[Cl^-]_i$  values; and the differences in the predicted  $[Cl^-]_i$ . **e)** Comparison of  $[Cl^-]_i$  predicted by  
 345  $E_{GABA}$  to  $MQAE-[Cl^-]_i$  and Nernst, \*\*\*\* $P < 0.0001$ . **f)** Correlation plot between calculated  $E_{GABA}-$   
 346  $[Cl^-]_i$  and  $MQAE-[Cl^-]_i$  values.



347

348

### 349 Mapping KCC2/NKCC1-dependent control of dendritic $\text{Cl}^-$ gradients

350 We measured the basal contributions of NKCC1 and KCC2 in setting dendritic  $[\text{Cl}^-]_i$ .  
 351 Proximal basal dendrites ( $[\text{Cl}^-]_{\text{pipette}} = 7.5 \text{ mM}$ ) were imaged by MQAE-FLIM before and after  
 352 bath application of furosemide or the NKCC1 inhibitor bumetanide (Fig 5a-d). Quantitative and  
 353 reversible increases in MQAE- $[\text{Cl}^-]_i$  were observed in furosemide, consistent with disruption of  
 354 basal  $\text{Cl}^-$  efflux by KCC2 (Fig 5a-c). On the other hand, bath application of bumetanide ( $50 \mu\text{M}$ )  
 355 to selectively block NKCC1 decreased resting  $[\text{Cl}^-]_i$  due to reduced  $\text{Cl}^-$  import. As a positive  
 356 control, membrane depolarization to  $+30 \text{ mV}$  also increased  $[\text{Cl}^-]_i$  in the presence of furosemide  
 357 or bumetanide (Fig 5c,d) but also in the absence of either blocker (Fig 5e), consistent with an  
 358 increased driving force for  $\text{Cl}^-$  entry through tonic  $\text{GABA}_A\text{R}$  activity and voltage-activated  $\text{Cl}^-$   
 359 channels. Thus, MQAE-FLIM has the sensitivity to measure millimolar contributions of  $\text{Cl}^-$   
 360 channels and transporters, as well as dynamic  $[\text{Cl}^-]_i$  changes.

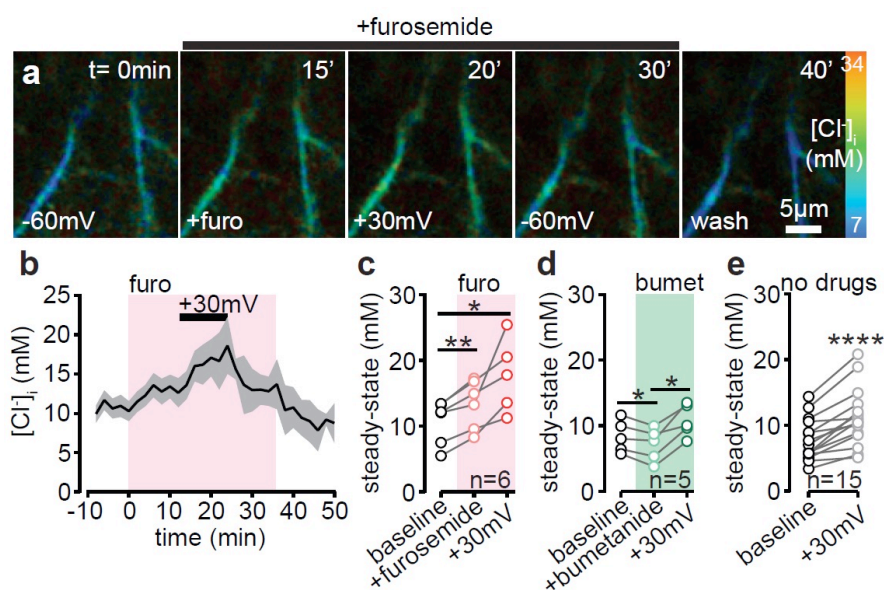

361 **Figure 5. MQAE-FLIM can detect KCC2-dependent changes in  $[Cl^-]_i$  with millimolar**  
362 **precision. a)** Example MQAE-FLIM image series of  $[Cl^-]_i$  in a basal dendrite from a patch  
363 clamped layer 4 cortical neuron ( $[Cl^-]_{\text{pipette}} = 7.5 \text{ mM}$ ) in the presence of furosemide (furo, 200  
364  $\mu\text{M}$ ) and membrane depolarization (+30 mV). **b)** Average trace of  $[Cl^-]_i$  changes over time in  
365 response to furosemide application (pink box) and membrane depolarization (n=6). **c)**  
366 Quantitative analysis comparing paired  $[Cl^-]_i$  measurements before and after furosemide (\*\*P =  
367 0.006) and membrane depolarization to +30 mV (\*P = 0.0378), one-way ANOVA with Tukey  
368 test. **d)** Quantitative comparison of paired  $[Cl^-]_i$  measurements before and after bumetanide  
369 (bumet, 50  $\mu\text{M}$ , \*P = 0.026) and membrane depolarization to +30 mV (\*P = 0.0165), one-way  
370 ANOVA with Tukey test. **e)** Membrane depolarization alone is sufficient to increase dendritic  
371  $[Cl^-]_i$ , \*\*\*\*P<0.0001, two tailed paired t-test.

372

### 373 **MQAE-FLIM reveals heterogeneous $Cl^-$ microdomains in cytotoxic edema**

374 The importance of  $Cl^-$  loading in cytotoxic swelling is well established (Rothman, 1985;  
375 Rungta et al., 2015) although little is known about the spatiotemporal dynamics and regulation of  
376 subcellular  $Cl^-$  loading in dendritic regions during edema. Excitotoxic injury in ischemia is  
377 thought to be triggered by NMDA receptor overstimulation leading to dendritic swelling and  
378 blebbing (Murphy et al., 2008; Thompson et al., 2008; Weilinger et al., 2016; Weilinger et al.,  
379 2012). We used MQAE-FLIM to monitor  $[Cl^-]_i$  dynamics under intense NMDA receptor  
380 stimulation in dendrites to recapitulate this form of ischemic injury. We used a strategy that we  
381 previously developed to restrict the actions of bath applied NMDA to only single patched  
382 clamped neuron (Dissing-Olesen et al., 2014). In these experiments 6 mM  $Mg^{2+}$  was included in  
383 the aCSF perfusate to block tissue-wide NMDAR responses from bath applied NMDA. Only  
384 single L4/5 cortical neurons that were patch clamped and depolarized to +30 mV to relieve the  
385 NMDAR  $Mg^{2+}$  block responded to NMDA application (20  $\mu\text{M}$ ) (Dissing-Olesen et al., 2014). In  
386 this way, swelling was restricted to the patched neuron throughout the experimental time course,

387 thereby providing the stability to simultaneously track  $MQAE-[Cl^-]_i$  and morphological changes in  
 388 dendritic regions over time in the intact brain slice.

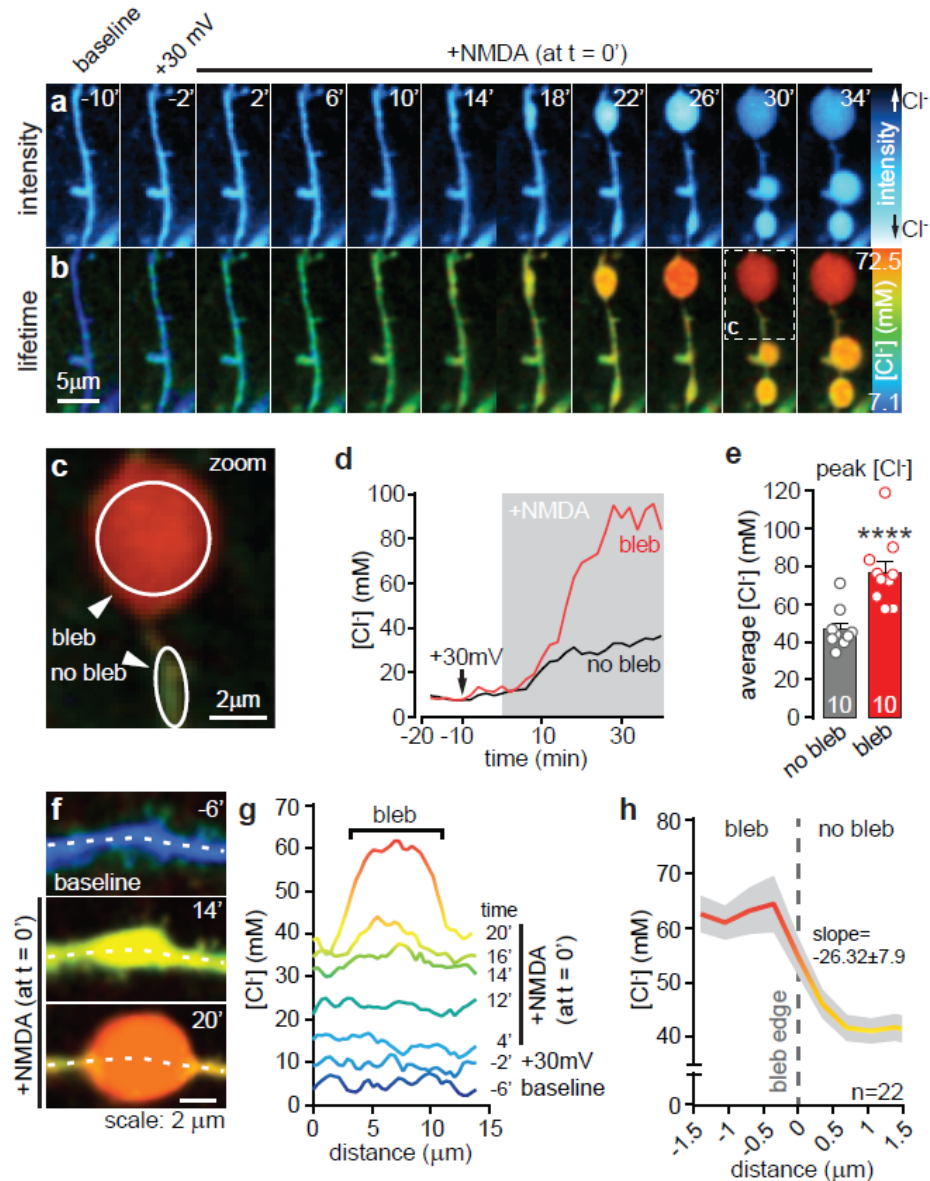

389

390 **Figure 6. MQAE-FLIM reveals heterogeneous  $[Cl^-]_i$  landscapes in excitotoxicity. a)**

391 Example imaging time series of MQAE intensity in dendrite from a patch-clamped neuron ( $[Cl^-]$   
 392  $]_{pipette} = 7.5$  mM) before and after membrane depolarization and bath application of NMDA (20

393  $\mu$ M). **b)** MQAE-FLIM image data (same dendrite from 'a') reveals dramatic  $[Cl^-]_i$

394 heterogeneities during dendritic blebbing that are not resolved from intensity images. **c)** Zoomed

395 image of dendrite from 'b' (white box  $t = 30$  min) depicting example ROIs encompassing blebbed

396 and adjacent un-blebbed dendrite. **d)** Representative  $[Cl^-]_i$  measurements over time from bleb  
397 and no bleb ROIs in the presence of NMDA. **e)** Quantitative summary of peak  $[Cl^-]_i$  measures  
398 comparing MQAE-FLIM signal from blebbed and unblebbed ROIs, \*\*\*\* $P < 0.0001$ . **f)** MQAE-  
399 FLIM time course showing the formation of a bleb. Time (in min) in the top right corner of the  
400 images indicates the time relative to application of NMDA (at  $t = 0$  min). Dotted white line  
401 indicates the ROI used to measure the pixel-to-pixel  $[Cl^-]_i$  levels over distance reported in 'g'. **g)**  
402 Spatial  $[Cl^-]_i$  readouts from before, during, and after formation of the bleb shown in 'f'. Each  
403 line represents a  $[Cl^-]_i$  measurement along a dendrite in a given frame. Corresponding time  
404 points are shown to the right of each trace. NMDA is applied at  $t = 0$  min. **h)** Average  $\pm$  s.e.m. of  
405 MQAE-FLIM  $[Cl^-]_i$  readouts across bleb edges reveal a sharp decrease  $[Cl^-]_i$  in from bleb to no  
406 bleb that occurs over less than a  $1 \mu m$  span. 'n' denotes 22 blebs from 9 cells.

407

408

409

410 NMDA induced a rapid increase in *MQAE*- $[Cl^-]_i$  followed by characteristic dendritic  
411 blebbing (Fig 6a,b) in depolarized neurons. We observed a surprising, heterogeneous distribution  
412 of  $[Cl^-]_i$  in excitotoxic conditions, with higher  $[Cl^-]_i$  constrained to dendrites that formed blebs  
413 (Fig 6c-e). Indeed,  $[Cl^-]_i$  in blebs was significantly higher than adjacent dendrites that did not  
414 bleb, often reaching peak concentrations of  $\sim 80$  mM (Fig 6d,e). Pixel-to-pixel lifetime  
415 measurements showed that  $Cl^-$  microdomains were spatially restricted across the length of  
416 dendrites (Fig 6f,g). We resolved precipitous drops in  $[Cl^-]_i$  spanning a measured bleb edge  
417 length of  $< 1 \mu m$  (mean  $[Cl^-]_i$  decrease =  $-26.32 \pm 7.9$  mM/ $\mu m$ ) (Fig 6h), suggesting that the  
418 mobility of  $Cl^-$  ions is constrained during blebbing.

### 419 **Excitotoxic $Cl^-$ dysregulation in dendrites is KCC2-dependent**

420 The mechanistic underpinnings of  $Cl^-$  entry in dendritic blebbing is a point of contention.  
421 Previous work has identified roles for VRACs in cultured neurons *in vitro*, and KCCs and

422 GABA<sub>A</sub> receptors in acute brain slices (Allen et al., 2004; Inoue and Okada, 2007; Pond et al.,  
423 2006; Steffensen et al., 2015). We sought to dissect which Cl<sup>-</sup> transporter or channel activity  
424 engendered the abnormally high but discrete [Cl<sup>-</sup>]<sub>i</sub> accumulations in dendritic blebs. We first  
425 confirmed the critical role for Cl<sup>-</sup> entry in swelling by reducing extracellular Cl<sup>-</sup> from 136.5 mM  
426 to 18.5 mM (low[Cl<sup>-</sup>]<sub>o</sub>). Low[Cl<sup>-</sup>]<sub>o</sub> blocked the Cl<sup>-</sup> influx as well as blebbing (Fig 7a-d) down to  
427 control levels (+30 mV only group, Fig 7d). Swelling also requires Na<sup>+</sup>-influx to drive Cl<sup>-</sup> entry  
428 and satisfy Gibbs-Donnan equilibrium (Glykys et al., 2017). Consistent with this, reducing Na<sup>+</sup>  
429 in otherwise normal ACSF decreased NMDA-induced Cl<sup>-</sup> influx (Fig 7a-d) and blebbing,  
430 confirming that concurrent Na<sup>+</sup> and Cl<sup>-</sup> loading is required.

431 We tested the role for NKCC1 in mediating Cl<sup>-</sup> entry in swelling by pre-incubating  
432 bumetanide prior to NMDA application. Interestingly, bumetanide increased the rate of Cl<sup>-</sup>  
433 loading during the initial NMDA application but the peak [Cl<sup>-</sup>]<sub>i</sub> accumulations during the plateau  
434 were not different from NMDA alone (Fig 7b,c). In contrast, blocking KCC2 with furosemide  
435 dramatically reduced the Cl<sup>-</sup> loading rate and average [Cl<sup>-</sup>]<sub>i</sub> load (Fig 7a-d). Cl<sup>-</sup> channel  
436 inhibitors, such as 5-Nitro-2-(3-phenylpropylamino)benzoic acid (NPPB, 100 μM) to block  
437 VRACs, picrotoxin (100 μM) for GABA<sub>A</sub> receptors, and niflumic acid (NFA, 100 μM) to block  
438 Ca<sup>2+</sup> activated Cl<sup>-</sup> channels had no effect on NMDA-induced Cl<sup>-</sup> loading. Together, these data  
439 highlight the importance of the local regulation of Cl<sup>-</sup> microdomains to maintain dendrite  
440 volume. Further, our findings suggest that Cl<sup>-</sup> dysregulation in excitotoxic blebbing occurs  
441 principally through reversed uptake by KCC2.

442

443

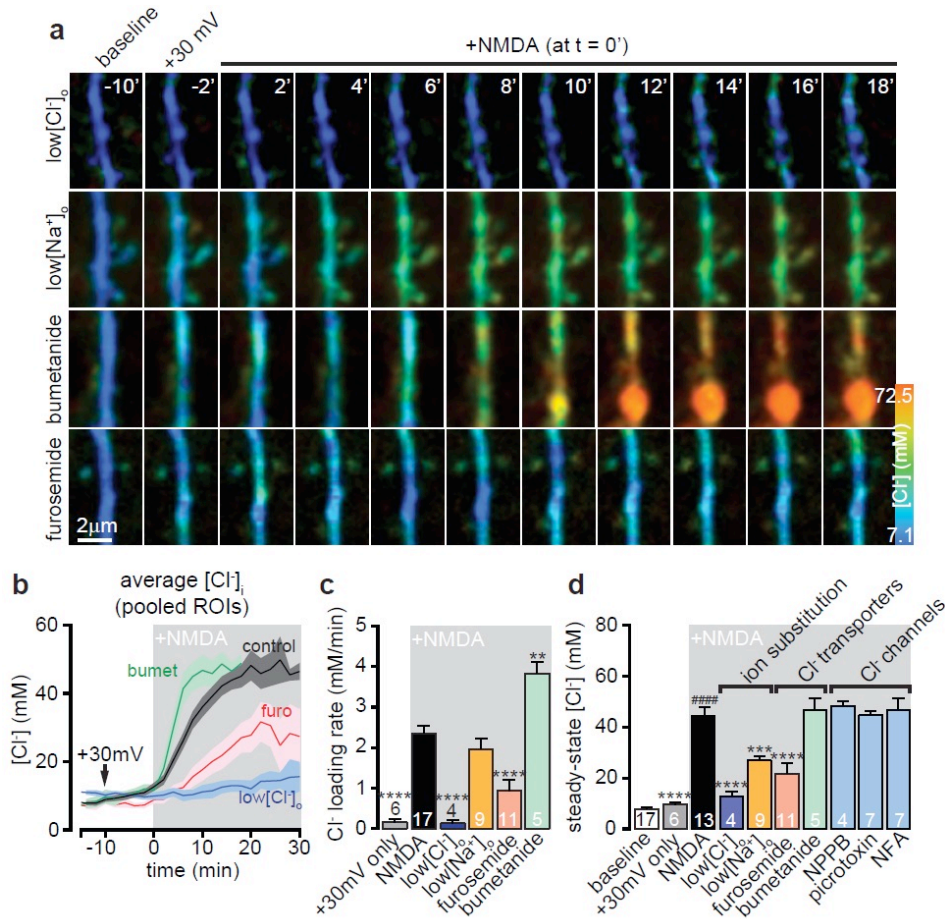

444

445

446 **Figure 7. NMDA-induced  $Cl^-$  influx and blebbing is KCC2 dependent.** **a)** Example MQAE-  
 447 FLIM time-lapses of NMDA-induced blebbing in low  $[Cl^-]_o$ , low  $[Na^+]_o$ , bumetanide, and  
 448 furosemide conditions. NMDA (20  $\mu M$ ) was continually applied at time = 0 min. **b)** Average  
 449 MQAE- $[Cl^-]_i$  readouts over time for datasets outlined in 'a'. Data are pooled ROI averages (i.e.  
 450 encompassing blebbed and non-blebbed ROIs). **c)** Average  $Cl^-$  loading rate, calculated from the  
 451 rising slope of NMDA-induced  $Cl^-$  increase from 'b'. +30 mV only indicates continuous  
 452 depolarization for 40 min. \*\*\*\* $P < 0.0001$  for NMDA alone compared to +30mV,  $[Cl^-]_o$ , and  
 453 furosemide conditions, \*\* $P = 0.0032$  compared to bumetanide, one-way ANOVA with Tukey  
 454 test. **d)** Quantitative summary of steady-state MQAE- $[Cl^-]_i$  at 15 min post NMDA application.  
 455 #### $P < 0.0001$  NMDA alone vs baseline, \*\*\*\* $P < 0.0001$  significance vs NMDA alone, one-way  
 456 ANOVA with Tukey test.

457

458

459 **Legends for movies 1, 2 and 3 that provide time lapse illustrations for data in Figure 7:**

460 **Movie 1: NMDA triggers dendritic [Cl<sup>-</sup>]<sub>i</sub> loading and blebbing.** Time lapse of MQAE-FLIM  
461 images to measure spatiotemporal changes in dendritic [Cl<sup>-</sup>]<sub>i</sub>. NMDA (20 μM) application  
462 occurs at ‘+NMDA’ tag and is immediately followed by dramatic and localized increases in  
463 [Cl<sup>-</sup>]<sub>i</sub> that form dendritic blebs.

464

465 **Movie 2: Dendritic blebbing requires Cl<sup>-</sup> influx.** Application of NMDA (20 μM) does not  
466 generate substantial subcellular increases in low [Cl<sup>-</sup>]<sub>o</sub> conditions and dendritic blebbing does  
467 not occur, indicating that dendritic NMDA-induced blebbing requires Cl<sup>-</sup> influx.

468

469 **Movie 3: Blocking KCC2 with furosemide reduces NMDA-induced Cl<sup>-</sup> influx and**  
470 **blebbing.** Bath pre-application of furosemide (200 μM) dramatically reduced Cl<sup>-</sup> loading and  
471 blebbing in the presence of NMDA (20 μM), indicating that KCC2 transport direction is reversed  
472 in cytotoxic edema.

473

474

475

476

477

## 478 Discussion

479 Early observations of subcellular  $[Cl^-]_i$  heterogeneities using electrophysiology (Alger  
480 and Nicoll, 1979; Barker and Ransom, 1978; Nicoll et al., 1976) have been corroborated by  
481 recent studies employing ratiometric sensors (Berglund et al., 2006; Glykys et al., 2014; Kuner  
482 and Augustine, 2000; Sulis Sato et al., 2017), however our understanding of the spatial  
483 regulation and functional impact of these microdomains is limited. Here we demonstrate that  
484 pairing MQAE-FLIM with electrophysiology allowed us to provide the first high resolution  
485 quantitative measurements of the spatiotemporal  $[Cl^-]_i$  dynamics throughout cortical pyramidal  
486 dendrites. MQAE-FLIM had both the sensitivity and dynamic range to measure equilibrative  
487  $[Cl^-]_i$  changes under resting conditions and cytotoxic changes during intense NMDA receptor  
488 stimulation. We quantified the basal contributions of NKCC1 and KCC2 in maintaining  $[Cl^-]_i$  at  
489 rest as well as modest changes in dendritic  $[Cl^-]_i$  incurred by membrane depolarization.  
490 Importantly, we report that NMDA-induced cytotoxic swelling is driven by  $Cl^-$  influx via KCC2  
491 reversed transport. Our observations lead to the surprising conclusion that discrete microdomains  
492 of high  $[Cl^-]_i$  can be generated with sharp boundaries that give rise to dendritic blebbing.

493 Quantifying dendritic  $Cl^-$  dynamics and spatial distributions have been longstanding  
494 challenges. This is due to the robust homeostatic control of  $Cl^-$  gradients, as well as the  
495 bidirectional nature of  $Cl^-$  flux that depends on dynamic  $E_m$  and  $E_{Cl^-}$  values (Arosio and Ratto,  
496 2014). Additionally  $Cl^-$  imaging using many genetically encoded fluorescent proteins is  
497 problematic due to pH sensitivity, but also non-uniform distortions caused by the optical  
498 properties of brain tissue that alter even ratiometric excitation and emission values (Oheim et al.,  
499 2001; Sulis Sato et al., 2017). This is further complicated by volume changes that occur in  
500 parallel with  $[Cl^-]_i$ , which can affect intrinsic optical properties of the tissue and thereby



501 subsequent intensity changes. Two recent studies show substantial improvements in this area  
502 using dual ratiometric  $\text{Cl}^-$ -pH sensors such as ClopHensorN and LSSmClopHesnsor (Mukhtarov  
503 et al., 2013; Sulis Sato et al., 2017). However MQAE-FLIM is still preferable for quantitative  
504 studies due to its high  $\text{Cl}^-$  affinity, fast detection kinetics, insensitivity to changes in emission  
505 intensity, dye concentration, photobleaching, and light scattering (Arosio and Ratto, 2014;  
506 Fukuda et al., 1998; Kovalchuk and Garaschuk, 2012; Marandi et al., 2002; Verkman et al.,  
507 1989). MQAE is also relatively insensitive to pH fluctuations (Koncz and Daugirdas, 1994) and  
508 viscosity (Kaneko et al., 2002). In support of this, we observed a near-complete inhibition of  
509 NMDA-induced rises in  $\text{MQAE-}[\text{Cl}^-]_i$  in low $[\text{Cl}^-]_o$ , even though NMDA triggers cytosolic  
510 acidification (Canzoniero et al., 1996). One limitation for imaging MQAE is nonspecific but  
511 modest quenching by gluconate, EGTA and HEPES (but notably not by endogenous anions such  
512 as  $\text{SO}_4^{2-}$ ,  $\text{HCO}_3^-$ , and  $\text{PO}_4^{3-}$ ) (Kaneko et al., 2002; Kovalchuk and Garaschuk, 2012). This is  
513 typically controlled for by calibrating the dye *in situ*, although complete  $[\text{Cl}^-]_i:[\text{Cl}^-]_o$   
514 equilibration is difficult to achieve. Indeed, our measured  $K_{SV}$  for *in situ* ( $6.53 \text{ M}^{-1}$ ) and *in vitro*  
515 ( $20.19 \text{ M}^{-1}$ ) calibrations were both within the range of *in situ* experiments from another group ( $5$ -  
516  $20 \text{ M}^{-1}$ ) (Kaneko et al., 2004) and well below MQAE in distilled water ( $185 \text{ M}^{-1}$ ). It is therefore  
517 beneficial to patch load MQAE, as these unspecific anion interactions can be controlled for by  
518 their inclusion in calibration solutions.

519 Notwithstanding the challenges and considerations associated with lifetime imaging, our  
520 MQAE-FLIM readouts from bulk- and pipette-loaded configurations are in agreement with each  
521 other and with basal  $[\text{Cl}^-]_i$  values predicted in the literature (Delpire and Staley, 2014; Kuner and  
522 Augustine, 2000; Staley and Proctor, 1999). An important validation of our approach is its  
523 accuracy compared to regional  $E_{GABA}$  measures.  $\text{MQAE-}[\text{Cl}^-]_i$  readouts were  $<10 \text{ mM}$  below

524  $E_{GABA}-[Cl^-]_i$ , which we attribute to a combination of GABA<sub>A</sub>R HCO<sub>3</sub><sup>-</sup> efflux (Kaila, 1994) and  
525 imperfect voltage clamp due to K<sup>+</sup> leak in the absence of K<sup>+</sup> channel blockers. Nevertheless, the  
526 variance in both our  $MQAE-[Cl^-]_i$  and  $E_{GABA}-[Cl^-]_i$  values were strongly correlated, and  
527 commensurate with the physiological heterogeneity in  $[Cl^-]_i$  reported by other groups (Barker  
528 and Ransom, 1978; Delpire and Staley, 2014; Glykys et al., 2014; Khirug et al., 2008; Kuner and  
529 Augustine, 2000; Sulis Sato et al., 2017). There was also no detectable impact of Br<sup>-</sup> ion flux  
530 either  $MQAE-[Cl^-]_i$ , meaning MQAE-Br could be used over a broad concentration range  
531 depending on experimental requirements. The stability of  $MQAE-[Cl^-]_i$  over a 60 min recording  
532 indicates that quenching from endogenous and exogenously (pipette) supplied anion species was  
533 minimal relative to Cl<sup>-</sup>. Thus, the variability of  $[Cl^-]_i$  we observe within neuronal dendrites  
534 highlights the clear need for quantitative evaluations of the functional implications of Cl<sup>-</sup>  
535 microdomains.

536         The temporal dynamics of Cl<sup>-</sup> handling has been shown to be modified over time scales  
537 of days (during development), minutes (KCC2 posttranslational regulation by calpains or  
538 WNK/SPAK), and milliseconds-seconds (ionic plasticity, shunting) (Alessi et al., 2014; Doyon  
539 et al., 2016; Kaila et al., 2014). With MQAE-FLIM we quantified transport capacity of NKCC1  
540 and KCC2 over time but also at multiple subcellular sites. For example, patched neurons and  
541 astrocytes defended their respective low (<10 mM) and high (15-20 mM)  $[Cl^-]_i$  setpoints when  
542 dialyzed with mismatched Cl<sup>-</sup> loads. Interestingly, we observed regional variance in Cl<sup>-</sup> export  
543 in both cell types, with higher transport efficiency in dendrites and fine processes. MQAE-FLIM  
544 also enabled us to measure a wide range of  $[Cl^-]_i$  changes. By blocking KCC2 or NKCC1 in  
545 dendrites with either furosemide or bumetanide, we could quantify subtle (<5 mM) changes in  
546 Cl<sup>-</sup> transport at rest with basal synaptic transmission intact. Detection of such modest  $[Cl^-]_i$

547 variations is testament to the sensitivity and practicability of MQAE-FLIM, as millimolar  
548 changes would affect excitability (Doyon et al., 2016). We also measured large  $[Cl^-]_i$  changes in  
549 neurons loaded with  $[Cl^-]_{\text{pipette}} = 80$  mM, where somatic and dendritic was reduced typically  
550 below 40 mM in part by export via KCC2. This allowed us to also quantify the impact of KCC2  
551 dephosphorylation in T906A/T1007A mice (Friedel et al., 2015; Heubl et al., 2017; Moore et al.,  
552 2018; Pisella et al., 2019; Watanabe et al., 2019), where  $[Cl^-]_i$  was maintained at near-control  
553 levels despite an elevated  $[Cl^-]_{\text{pipette}}$  load (80 mM). Indeed, there is growing appreciation for  
554 dynamic KCC2 phosphorylation, for example in establishing excitatory GABAergic tone during  
555 development, impacting cognitive function, and susceptibility to epileptiform activity (Friedel et  
556 al., 2015; Moore et al., 2019; Moore et al., 2018; Pisella et al., 2019; Silayeva et al., 2015;  
557 Watanabe et al., 2019).

558 Evidence of spatial  $[Cl^-]_i$  heterogeneity within cellular subcompartments in previous  
559 studies (Barker and Ransom, 1978; Berglund et al., 2006; Glykys et al., 2014; Khirug et al.,  
560 2008; Kuner and Augustine, 2000) suggested that standing  $Cl^-$  gradients could exist within  
561 cytoplasmic domains of neurons. Our observations of inhomogeneous  $[Cl^-]_i$  distributions in  
562 dendrites at rest and the dramatic induction of discrete  $[Cl^-]_i$  microdomains that lead to dendritic  
563 blebs with distinct edges indicates that  $Cl^-$  mobility can be spatially restricted. Although  
564 controversial (Kaila et al., 2014), the suggestion that  $Cl^-$  ions are diffusion-limited, even at rest,  
565 has been proposed to occur due to a nonuniform distribution of immobile intracellular and  
566 extracellular anions [(Glykys et al., 2014) see also co-submission by Rahmati et al., 2020]. While  
567 our data cannot confirm the role of immobile anions in setting  $Cl^-$  microdomains, the uneven  
568 distribution cytosolic proteins (Gut et al., 2018) could give rise to compensatory heterogeneities  
569 in mobile  $Cl^-$  ions. In cytotoxic edema, breakdown of negatively charged proteins and structural

570 actin is well established in excitotoxicity (Halpain et al., 1998; Lipton, 1999) and would likely  
571 affect  $\text{Cl}^-$  mobility in dendrites (Glykys et al., 2014). The possibility of  $\text{Cl}^-$  microdomains might  
572 be expected in some dendritic regions given that dendritic morphology alone can affect ion  
573 diffusion. For instance, the thin necks of synaptic spines can restrict  $\text{Ca}^{2+}$  diffusion and  
574 propagation of electrical potentials between spine heads and dendrites (Kwon et al., 2017; Yuste  
575 and Denk, 1995). Additionally, recent modelling studies predict that longitudinal  $\text{Cl}^-$  diffusion in  
576 dendrites is restricted by the distribution and strength of  $\text{K}^+$ - $\text{Cl}^-$  cotransporters (Doyon et al.,  
577 2011), by tortuosity imposed spines (Mohapatra et al., 2016), and even by passive membrane  
578 properties (Lombardi et al., 2019), all of which could affect local GABAergic inhibition and  
579 ionic plasticity. Given that little is known about  $\text{Cl}^-$  microdomains and their regulation at the  
580 sub-dendritic level, future studies using MQAE-FLIM will be fundamental to understanding  
581 KCC2's vital role in synaptic physiology.

582         The data presented here indicate that formation of pathological blebs requires reversed  
583 KCC2 transport that generates microdomains of high dendritic  $[\text{Cl}^-]_i$ . Quantitative readouts of  
584 dendritic  $[\text{Cl}^-]_i$  revealed spatially discrete increases in  $\text{Cl}^-$  that were blocked by furosemide,  
585 leading to our conclusion that KCC2 drives  $\text{Cl}^-$  import into blebs. We also observed a surprising  
586 increase in  $\text{Cl}^-$  loading rate when NKCC1 was blocked with bumetanide, indicating that NKCC1  
587 was also pumping in reverse mode (i.e.  $\text{Cl}^-$  export) which has been suggested to occur when  $\text{Na}^+$ ,  
588  $\text{K}^+$ , and  $\text{Cl}^-$  concentration gradients are dramatically altered (Brumback and Staley, 2008; Glykys  
589 et al., 2017; Kaila et al., 2014). KCC2 transport direction depends on the outwardly-directed  $\text{K}^+$   
590 gradient but also the stoichiometry of  $\text{K}^+:\text{Cl}^-$  ions (Payne, 1997). *In silico* and *in vitro*  
591 experiments on KCC2 thermodynamic driving force have shown  $\text{K}^+/\text{Cl}^-$  cotransport can reverse  
592 when  $[\text{K}^+]_o$  increases beyond 5 mM (DeFazio et al., 2000; Payne, 1997). Reversed transport is

593 therefore likely to occur in excitotoxicity/stroke, where  $[K^+]_o$  increases to  $>60$  mM (Hansen and  
594 Nedergaard, 1988; Rossi et al., 2007). A recent study showed that brief ischemia induced  
595 prolonged ( $>1$ hr) increases in neuronal  $[Cl^-]_i$  and epileptiform activity that were sensitive to  
596 furosemide block (Blauwblomme et al., 2018). Further, the frequently observed decrease in  
597 KCC2 expression in neurotraumas (Coull et al., 2003; Jaenisch et al., 2010; Kaila et al., 2014;  
598 Zhou et al., 2012) could be explained by the present findings as a protective adaptation to  
599 minimize pathological  $Cl^-$  loading in neurons. In conclusion, our joint MQAE-FLIM and  
600 electrophysiology approach has provided valuable insights into the tight spatiotemporal  
601 regulation of  $[Cl^-]_i$  microdomains as it relates to integration of synaptic currents, but also in  
602 neuropathologies where perturbed  $Cl^-$  handling can degrade inhibitory tone in epilepsy or trigger  
603 dendritic swelling in cerebral edema (Cohen et al., 2002; Rungta et al., 2015).

604

## 605 **Methods**

### 606 **Animals**

607 All animal care protocols were approved by the University of British Columbia's Animal  
608 Care Committee in accordance with the Canadian Council on Animal Care guidelines. Acute  
609 slice experiments from rat were performed on postnatal day (P)  $>25$  Sprague Dawley rats  
610 (Charles River). Mouse experiments were performed on P $>25$  KCC2<sup>AA</sup> (homozygous) or  
611 KCC2<sup>WT</sup> animals. All animals were housed on a 12/12hr light/dark cycle with at least one cage  
612 mate and *ad libidum* access to laboratory chow and water.

### 613 **Acute Cortical Slice Preparation**

614 Rats were anaesthetized by isoflourane inhalation in air and decapitated. The brain was  
615 quickly extracted, blocked, and mounted on a vibrating slicer (Leica VT1200S) while submerged  
616 in an ice-cold solution consisting of (in mM): 120 NMDG, 2.5 KCl, 25 NaHCO<sub>3</sub>, 1 CaCl<sub>2</sub>, 7  
617 MgCl<sub>2</sub>, 1.25 NaH<sub>2</sub>PO<sub>4</sub>, 20 glucose, 2.4 Na-pyruvate, 1.3 Na-ascorbate and saturated with 95%  
618 O<sub>2</sub>/5% CO<sub>2</sub>. Transverse cortical slices were cut (370 μm) and transferred into a chamber  
619 containing artificial cerebral spinal fluid (aCSF) at 33°C for at least one hour prior to  
620 experimentation. aCSF consisted of 126 mM NaCl, 26 mM NaHCO<sub>3</sub>, 2.5 mM KCl, 1.25 mM  
621 NaH<sub>2</sub>PO<sub>4</sub>, 2 mM MgCl<sub>2</sub>, 2 mM CaCl<sub>2</sub>, and 10 mM glucose and was continuously bubbled with  
622 95% O<sub>2</sub>/5% CO<sub>2</sub>.

### 623 **Chemicals and Reagents**

624 Drugs and dyes used for experiments are listed in final concentration (in mM) and were  
625 purchased from the following suppliers: 0.2 furosemide, 0.1 niflumic acid (Cayman Chemicals),  
626 0.05 bumetanide, 0.05 picrotoxin, 0.02 NMDA, 0.01 tributyltin, all salts for aCSF and slicing  
627 solution (Sigma-Aldrich), 0.01 Glycine (EMD Chemicals), 0.1 NPPB, 0.05 bumetanide, and 0.01  
628 nigericin (Tocris), 0.05 Alexa-594 hydrazide, 0.6-8 MQAE (Thermo Fisher Scientific). All drugs  
629 were made into aliquots dissolved in water or DMSO and diluted to the final concentration in  
630 aCSF or intracellular recording solution – the final concentration of DMSO never exceeded  
631 0.1%.

### 632 **Electrophysiology**

633 After stabilization, slices were carefully transferred to a recording chamber continually  
634 perfused with aCSF (33°C, stage heater from Luigs & Neumann) at a rate of 1-2 mL/min. Layer  
635 4/5 pyramidal neurons in the cortex were identified using widefield infrared (IR) illumination

636 and captured with an IR-1000 (DAGE-MTI) camera fitted on a LSM 7MP 2-photon imaging  
637 system (Zeiss). Whole-cell patch clamp recordings were obtained using thin-walled borosilicate  
638 glass microelectrodes (Warner) pulled to a tip resistance of 3-5 M $\Omega$  pulled using a P-97  
639 Flaming/Brown Micropipette Puller (Sutter Instrument). Electrodes were filled with an  
640 intracellular recording solution containing (in mM): 108 K-Gluconate, 3 KCl, 2 MgCl<sub>2</sub>, 8 Na-  
641 Gluconate, 1 K<sub>2</sub>-EGTA, 0.23 CaCl<sub>2</sub>, 0.05 Alexa-594, 6-8 MQAE, 4 K<sub>2</sub>-ATP and 0.3 Na<sub>3</sub>-GTP at  
642 pH 7.25 with 10 HEPES. 15 minutes was allotted for intracellular equilibration for all  
643 experiments unless otherwise indicated. Recordings were made using a MultiClamp 700B  
644 amplifier and Digidata 1440A digitiser (Axon Instruments, Molecular Devices) controlled via  
645 Clampex 10.7 acquisition software. Cells were voltage clamped at -60 mV unless specified  
646 otherwise. Access resistance was always <20 M $\Omega$ , and cells with holding currents below -100  
647 pA after break-in were discarded.

#### 648 **Time-Resolved 2-photon fluorescent lifetime imaging setup**

649 All experiments were performed on a LSM 7MP 2-photon imaging system from Zeiss  
650 fitted with a SPC-150 FLIM acquisition module from Becker & Hickl. Femtosecond excitation  
651 was achieved with a Ti:Sapphire Chameleon Ultra II 2-photon laser (Coherent) pulsing at  
652 80MHz and tuned to 750nm. Laser pulse timing was collected directly from the laser's internal  
653 photodiode. Images were acquired with a Zeiss 20X-W/1.0 NA objective at digital zooms  
654 ranging from 3x-12x at 256x256 or 128x128 pixel resolutions depending on zoom factor.  
655 Emission light was first passed through an IR filter (700nm shortpass) to block spurious  
656 excitation light, then split with a 480nm longpass dichroic mirror (Chroma tech). Blue MQAE  
657 fluorescence was then filtered with a 460/50nm bandpass filter and collected with a GaAsP  
658 hybrid detector (HPM-100-40 hybrid PMT, Becker and Hickl). After the 480nm beam splitter,

659 red emission from Alexa-594 was passed through a 630/75nm bandpass filter (Chroma) before  
660 detection with a LSM BiG GaAsP photomultiplier (Zeiss).

### 661 **MQAE-FLIM Calibrations**

662 *In situ* calibrations were conducted as previously described (Gensch et al., 2015; Kovalchuk and  
663 Garaschuk, 2012) to measure  $[Cl^-]_i$  in neurons and astrocytes bulk loaded with MQAE. Briefly,  
664 acute transverse hippocampal/cortical slices were incubated in 6 mM MQAE for 20 min at 33-  
665 34°C. Slices were then transferred to the imaging chamber containing the  $Cl^-/OH^-$  antiporter  
666 tributyltin and the  $K^+/H^+$  ionophore nigericin in a 0-40 mM KCl solution also containing 10 mM  
667 HEPES, 10 mM Na-Gluconate, pH balanced to 7.35 with KOH, osmolarity adjusted to 300 with  
668 K-Gluconate, and warmed to 33°C.

669 *In vitro* MQAE calibrations were performed to match the recording conditions in whole-cell  
670 patch clamp experiments. Calibration solutions exactly mimicked the internal recording solution  
671 (see ‘*Electrophysiology*’) including Alexa-594. The desired  $Cl^-$  concentration was achieved by  
672 adjusting the concentration of KCl and was balanced by equimolar K-gluconate. For 2.5mM  $[Cl^-$   
673 ], some  $MgCl_2$  was substituted with  $MgSO_4$ , as MQAE fluorescence is not quenched by  $SO_4^{2-}$   
674 anions (Kaneko et al., 2002). The calibration solution was placed in a sealed micropipette and  
675 imaged in warmed (33°C) aCSF under the microscope using consistent experimental parameters  
676 as *in situ*. Calibration data were fit in GraphPad Prism 6 with a one-phase exponential decay  
677 curve to match the monoexponential decay parameters of MQAE lifetime:

$$678 \quad Y = (Y_o - A)e^{-K*X} + A$$



679 Where  $Y$  = measured lifetime (in ps),  $X = [\text{Cl}^-]$ ,  $Y_0$  = lifetime at  $0[\text{Cl}^-]$  (in ps),  $A$  = lifetime  
680 horizontal asymptote at high  $[\text{Cl}^-]$  (in ps),  $K$  = rate constant. Our best-fit line calculated from  
681 pooled averages was:

$$682 \quad Y = (4139 - 1247)e^{-0.02902 * X} + 1247$$

683 Due to the limitations of the curve fit, any measured lifetime values that were above the upper  
684 limit of 4139 ps were set to 0 mM  $[\text{Cl}^-]$ . The  $K_d$  value for  $\text{Cl}^-$ -dependent MQAE quenching was  
685 calculated as  $K_d = 0.69/K$ .

## 686 **Fluorescent Lifetime Imaging and Data Analysis**

687 For bulk loaded imaging, slices were loaded with MQAE (6 mM) as described above. Neuronal  
688 somata were identified visually, and astrocytes were identified by SR101 stain (1  $\mu\text{M}$ , post-slice  
689 incubation) or visually in unstained tissue. Images were acquired by continual XY frame  
690 scanning over 15s-60s to ensure adequate photon counts for accurate lifetime curve-fitting at low  
691 laser power. All cells were imaged between 50-100 $\mu\text{m}$  below the slice surface to balance  
692 minimal fluorescent scattering and maximal cell viability. For patch loaded imaging, cells were  
693 dialyzed with internal solution containing 6 mM MQAE for a least 15 min prior to imaging to  
694 allow for complete equilibration of dye and pipette salts.

695 Lifetime data were collected in parallel to signal intensity for each pixel and analysed, and the  
696 intensity data were used to process lifetime data and for illustration purposes. Lifetime data were  
697 processed using SPCImage 7.3 software from Becker & Hickl and decay values of each pixel  
698 were calculated based on a monoexponential fit described above. A bin factor of 1 was used to  
699 attain a photon count  $\geq 10$  at the tail (9ns after laser pulse) and a  $\chi^2$  fit value close to 1. Lifetime

700 decay matrices were decimated from 32 bit to 16 bit by rounding values to the nearest 1 ps in  
701 MATLAB (Mathworks). Intensity images were used as a registration template to align the  
702 lifetime images in MATLAB, and dendritic lifetime signals were measured in ImageJ. For  
703 dendritic recordings, ROIs were mapped on intensity images to ensure signal measurements were  
704 in-focus and transferred to the lifetime image. All colour-coded example FLIM images in the  
705 figures are intensity-weighted RGB images for ease of visualisation of MQAE signal over  
706 background fluorescence.

### 707 **Rubi-GABA uncaging**

708 Rubi-GABA (Rial Verde et al., 2008) was purchased from Tocris and dissolved directly into  
709 recording aCSF at 0.5 mM and stored as frozen aliquots prior to use. The Rubi-GABA solution  
710 was always protected from ambient light, during preparation and experimentation. Rubi-GABA  
711 was locally puff-ejected near the patched neuron (~100  $\mu\text{m}$ ) and held at a constant pressure of 1  
712 psi throughout the experiment. Somatic MQAE-FLIM measures were then taken with the 2-  
713 photon laser tuned to 750 nm and imaged at low power (<4 mW) to prevent GABA uncaging  
714 during the acquisition. The laser was then tuned to 800 nm for Rubi-GABA photolysis, and  
715 uncaging laser power was slowly increased until reliable GABA<sub>A</sub> receptor currents were  
716 observed at  $V_m = -80$  mV (50 ms pulses). Patched neurons were filled with 8 mM MQAE in 80  
717 mM Cl<sup>-</sup> intracellular recording solution, and 0.5  $\mu\text{M}$  TTX was included in normal aCSF to block  
718 voltage-gated Na<sup>+</sup> channels. A liquid junction potential of 6 mV was applied to all voltage steps.  
719  $E_{GABA-[\text{Cl}^-]_i}$  was calculated from  $E_{GABA}$  using the Nernst Equation.

### 720 **Dendritic blebbing assay**

721 To isolate swelling in a single cell we used a high  $Mg^{2+}$  (6 mM) aCSF solution to increase the  
722 likelihood of voltage-dependent  $Mg^{2+}$  block of tissue-wide NMDA receptors as previously  
723 described (Dissing-Olesen et al., 2014). Layer 4/5 cortical neurons were whole-cell patch  
724 clamped with MQAE in a K-gluconate internal solution described above and held at  $V_m = -60$   
725 mV. Cells were dialyzed for a 10-20 min baseline period prior to imaging, followed by a 10 min  
726 depolarization to  $V_m = +30$  mV to ensure complete unblock NMDA receptors in dendrites and  
727 accommodate loss of membrane potential control from space clamp issues. Sustained bath  
728 application of 20  $\mu$ M NMDA and 10  $\mu$ M glycine was used to trigger  $Cl^-$  loading and swelling.  
729 Low  $[Cl^-]_o$  aCSF was made by replacing NaCl with equimolar Na-Gluconate, and low  $[Na^+]_o$   
730 aCSF by replacing NaCl with NMDG<sup>+</sup> and pH balanced with HCl. Apical dendrites were  
731 selected for imaging based on their proximity to the soma for voltage clamp ( $<100 \mu$ m), and  
732 images were acquired over 20-30s, typically 160 frames, every 2 min to minimize phototoxicity.

733

### 734 **Acknowledgements**

735 N.L.W collected and analyzed the data and wrote and edited the manuscript with B.A.M. N.L.W  
736 and K.K. designed the study with B.A.M., and B.A.M. supervised the study.

737

### 738 **References**

739 Alessi, D.R., Zhang, J., Khanna, A., Hochdorfer, T., Shang, Y., and Kahle, K.T. (2014). The WNK-  
740 SPAK/OSR1 pathway: master regulator of cation-chloride cotransporters. *Sci Signal* 7, re3.  
741 Alger, B.E., and Nicoll, R.A. (1979). GABA-mediated biphasic inhibitory responses in hippocampus.  
742 *Nature* 281, 315-317.  
743 Allen, N.J., Rossi, D.J., and Attwell, D. (2004). Sequential release of GABA by exocytosis and reversed  
744 uptake leads to neuronal swelling in simulated ischemia of hippocampal slices. *J Neurosci* 24, 3837-3849.

- 745 Arosio, D., Garau, G., Ricci, F., Marchetti, L., Bizzarri, R., Nifosi, R., and Beltram, F. (2007).  
746 Spectroscopic and structural study of proton and halide ion cooperative binding to gfp. *Biophysical*  
747 *journal* *93*, 232-244.
- 748 Arosio, D., and Ratto, G.M. (2014). Twenty years of fluorescence imaging of intracellular chloride.  
749 *Frontiers in cellular neuroscience* *8*, 258.
- 750 Barker, J.L., and Ransom, B.R. (1978). Amino acid pharmacology of mammalian central neurones grown  
751 in tissue culture. *J Physiol* *280*, 331-354.
- 752 Berglund, K., Schleich, W., Krieger, P., Loo, L.S., Wang, D., Cant, N.B., Feng, G., Augustine, G.J., and  
753 Kuner, T. (2006). Imaging synaptic inhibition in transgenic mice expressing the chloride indicator,  
754 Clomeleon. *Brain cell biology* *35*, 207-228.
- 755 Blaesse, P., Airaksinen, M.S., Rivera, C., and Kaila, K. (2009). Cation-chloride cotransporters and  
756 neuronal function. *Neuron* *61*, 820-838.
- 757 Blauwblomme, T., Dzhalala, V., and Staley, K. (2018). Transient ischemia facilitates neuronal chloride  
758 accumulation and severity of seizures. *Annals of clinical and translational neurology* *5*, 1048-1061.
- 759 Bormann, J., Hamill, O.P., and Sakmann, B. (1987). Mechanism of anion permeation through channels  
760 gated by glycine and gamma-aminobutyric acid in mouse cultured spinal neurones. *J Physiol* *385*, 243-  
761 286.
- 762 Brumback, A.C., and Staley, K.J. (2008). Thermodynamic regulation of NKCC1-mediated Cl<sup>-</sup>  
763 cotransport underlies plasticity of GABA(A) signaling in neonatal neurons. *J Neurosci* *28*, 1301-1312.
- 764 Canzoniero, L.M., Sensi, S.L., and Choi, D.W. (1996). Recovery from NMDA-induced intracellular  
765 acidification is delayed and dependent on extracellular bicarbonate. *The American journal of physiology*  
766 *270*, C593-599.
- 767 Chen, L.C., Lloyd, W.R., 3rd, Chang, C.W., Sud, D., and Mycek, M.A. (2013). Fluorescence lifetime  
768 imaging microscopy for quantitative biological imaging. *Methods in cell biology* *114*, 457-488.
- 769 Chevy, Q., Heubl, M., Goutierre, M., Backer, S., Moutkine, I., Eugene, E., Bloch-Gallego, E., Levi, S.,  
770 and Poncer, J.C. (2015). KCC2 Gates Activity-Driven AMPA Receptor Traffic through Cofilin  
771 Phosphorylation. *J Neurosci* *35*, 15772-15786.
- 772 Cohen, I., Navarro, V., Clemenceau, S., Baulac, M., and Miles, R. (2002). On the origin of interictal  
773 activity in human temporal lobe epilepsy in vitro. *Science* *298*, 1418-1421.
- 774 Cordero-Erausquin, M., Coull, J.A., Boudreau, D., Rolland, M., and De Koninck, Y. (2005). Differential  
775 maturation of GABA action and anion reversal potential in spinal lamina I neurons: impact of chloride  
776 extrusion capacity. *J Neurosci* *25*, 9613-9623.
- 777 Coull, J.A., Boudreau, D., Bachand, K., Prescott, S.A., Nault, F., Sik, A., De Koninck, P., and De  
778 Koninck, Y. (2003). Trans-synaptic shift in anion gradient in spinal lamina I neurons as a mechanism of  
779 neuropathic pain. *Nature* *424*, 938-942.
- 780 DeFazio, R.A., Keros, S., Quick, M.W., and Hablitz, J.J. (2000). Potassium-coupled chloride cotransport  
781 controls intracellular chloride in rat neocortical pyramidal neurons. *J Neurosci* *20*, 8069-8076.
- 782 Delpire, E., and Staley, K.J. (2014). Novel determinants of the neuronal Cl<sup>-</sup> concentration. *J Physiol* *592*,  
783 4099-4114.
- 784 Dissing-Olesen, L., LeDue, J.M., Rungta, R.L., Hefendehl, J.K., Choi, H.B., and MacVicar, B.A. (2014).  
785 Activation of neuronal NMDA receptors triggers transient ATP-mediated microglial process outgrowth. *J*  
786 *Neurosci* *34*, 10511-10527.
- 787 Doyon, N., Prescott, S.A., Castonguay, A., Godin, A.G., Kroger, H., and De Koninck, Y. (2011). Efficacy  
788 of synaptic inhibition depends on multiple, dynamically interacting mechanisms implicated in chloride  
789 homeostasis. *PLoS computational biology* *7*, e1002149.
- 790 Doyon, N., Vinay, L., Prescott, S.A., and De Koninck, Y. (2016). Chloride Regulation: A Dynamic  
791 Equilibrium Crucial for Synaptic Inhibition. *Neuron* *89*, 1157-1172.
- 792 Friedel, P., Kahle, K.T., Zhang, J., Hertz, N., Pisella, L.I., Buhler, E., Schaller, F., Duan, J., Khanna,  
793 A.R., Bishop, P.N., *et al.* (2015). WNK1-regulated inhibitory phosphorylation of the KCC2 cotransporter  
794 maintains the depolarizing action of GABA in immature neurons. *Sci Signal* *8*, ra65.

795 Fukuda, A., Tanaka, M., Yamada, Y., Muramatsu, K., Shimano, Y., and Nishino, H. (1998).  
796 Simultaneous optical imaging of intracellular Cl<sup>-</sup> in neurons in different layers of rat neocortical slices:  
797 advantages and limitations. *Neuroscience research* 32, 363-371.  
798 Funk, K., Woitecki, A., Franjic-Wurtz, C., Gensch, T., Mohrlen, F., and Frings, S. (2008). Modulation of  
799 chloride homeostasis by inflammatory mediators in dorsal root ganglion neurons. *Molecular pain* 4, 32.  
800 Garand, D., Mahadevan, V., and Woodin, M.A. (2019). Ionotropic and metabotropic kainate receptor  
801 signalling regulates Cl<sup>-</sup> homeostasis and GABAergic inhibition. *J Physiol* 597, 1677-1690.  
802 Gauvain, G., Chamma, I., Chevy, Q., Cabezas, C., Irinopoulou, T., Bodrug, N., Carnaud, M., Levi, S.,  
803 and Poncer, J.C. (2011). The neuronal K-Cl cotransporter KCC2 influences postsynaptic AMPA receptor  
804 content and lateral diffusion in dendritic spines. *Proc Natl Acad Sci U S A* 108, 15474-15479.  
805 Gensch, T., Untiet, V., Franzen, A., Kovermann, P., and Fahlke, C. (2015). Determination of Intracellular  
806 Chloride Concentrations by Fluorescence Lifetime Imaging. *Advanced Time-Correlated Single Photon*  
807 *Counting Applications III*, 189-211.  
808 Gilbert, D., Franjic-Wurtz, C., Funk, K., Gensch, T., Frings, S., and Mohrlen, F. (2007). Differential  
809 maturation of chloride homeostasis in primary afferent neurons of the somatosensory system.  
810 *International journal of developmental neuroscience : the official journal of the International Society for*  
811 *Developmental Neuroscience* 25, 479-489.  
812 Glykys, J., Dzhalala, V., Egawa, K., Balena, T., Saponjian, Y., Kuchibhotla, K.V., Bacskai, B.J., Kahle,  
813 K.T., Zeuthen, T., and Staley, K.J. (2014). Local impermeant anions establish the neuronal chloride  
814 concentration. *Science* 343, 670-675.  
815 Glykys, J., Dzhalala, V., Egawa, K., Kahle, K.T., Delpire, E., and Staley, K. (2017). Chloride  
816 Dysregulation, Seizures, and Cerebral Edema: A Relationship with Therapeutic Potential. *Trends in*  
817 *neurosciences* 40, 276-294.  
818 Grimley, J.S., Li, L., Wang, W., Wen, L., Beese, L.S., Hellinga, H.W., and Augustine, G.J. (2013).  
819 Visualization of synaptic inhibition with an optogenetic sensor developed by cell-free protein engineering  
820 automation. *J Neurosci* 33, 16297-16309.  
821 Gulyas, A.I., Sik, A., Payne, J.A., Kaila, K., and Freund, T.F. (2001). The KCl cotransporter, KCC2, is  
822 highly expressed in the vicinity of excitatory synapses in the rat hippocampus. *The European journal of*  
823 *neuroscience* 13, 2205-2217.  
824 Gut, G., Herrmann, M.D., and Pelkmans, L. (2018). Multiplexed protein maps link subcellular  
825 organization to cellular states. *Science* 361.  
826 Halpain, S., Hipolito, A., and Saffer, L. (1998). Regulation of F-Actin Stability in Dendritic Spines by  
827 Glutamate Receptors and Calcineurin. *The Journal of Neuroscience* 18, 9835-9844.  
828 Hansen, A.J., and Nedergaard, M. (1988). Brain ion homeostasis in cerebral ischemia. *Neurochemical*  
829 *pathology* 9, 195-209.  
830 Heubl, M., Zhang, J., Pressey, J.C., Al Awabdh, S., Renner, M., Gomez-Castro, F., Moutkine, I., Eugene,  
831 E., Russeau, M., Kahle, K.T., *et al.* (2017). GABAA receptor dependent synaptic inhibition rapidly tunes  
832 KCC2 activity via the Cl<sup>-</sup>-sensitive WNK1 kinase. *Nat Commun* 8, 1776.  
833 Hyde, T.M., Lipska, B.K., Ali, T., Mathew, S.V., Law, A.J., Metitiri, O.E., Straub, R.E., Ye, T.,  
834 Colantuoni, C., Herman, M.M., *et al.* (2011). Expression of GABA signaling molecules KCC2, NKCC1,  
835 and GAD1 in cortical development and schizophrenia. *J Neurosci* 31, 11088-11095.  
836 Inoue, H., and Okada, Y. (2007). Roles of volume-sensitive chloride channel in excitotoxic neuronal  
837 injury. *J Neurosci* 27, 1445-1455.  
838 Jaenisch, N., Witte, O.W., and Frahm, C. (2010). Downregulation of potassium chloride cotransporter  
839 KCC2 after transient focal cerebral ischemia. *Stroke* 41, e151-159.  
840 Jun, I., Cheng, M.H., Sim, E., Jung, J., Suh, B.L., Kim, Y., Son, H., Park, K., Kim, C.H., Yoon, J.H., *et*  
841 *al.* (2016). Pore dilatation increases the bicarbonate permeability of CFTR, ANO1 and glycine receptor  
842 anion channels. *J Physiol* 594, 2929-2955.  
843 Kahle, K.T., Deeb, T.Z., Puskarjov, M., Silayeva, L., Liang, B., Kaila, K., and Moss, S.J. (2013).  
844 Modulation of neuronal activity by phosphorylation of the K-Cl cotransporter KCC2. *Trends in*  
845 *neurosciences* 36, 726-737.

846 Kaila, K. (1994). Ionic basis of GABAA receptor channel function in the nervous system. *Progress in*  
847 *neurobiology* 42, 489-537.

848 Kaila, K., Price, T.J., Payne, J.A., Puskarjov, M., and Voipio, J. (2014). Cation-chloride cotransporters in  
849 neuronal development, plasticity and disease. *Nature reviews Neuroscience* 15, 637-654.

850 Kaila, K., and Voipio, J. (1987). Postsynaptic fall in intracellular pH induced by GABA-activated  
851 bicarbonate conductance. *Nature* 330, 163-165.

852 Kaila, K., Voipio, J., Paalasmaa, P., Pasternack, M., and Deisz, R.A. (1993). The role of bicarbonate in  
853 GABAA receptor-mediated IPSPs of rat neocortical neurones. *J Physiol* 464, 273-289.

854 Kaneko, H., Putzier, I., Frings, S., and Gensch, T. (2002). Determination of intracellular chloride  
855 concentration in dorsal root ganglion neurons by fluorescence lifetime imaging. *Current Topics in*  
856 *Membranes* 53, 167-189.

857 Kaneko, H., Putzier, I., Frings, S., Kaupp, U.B., and Gensch, T. (2004). Chloride accumulation in  
858 mammalian olfactory sensory neurons. *J Neurosci* 24, 7931-7938.

859 Kettenmann, H., and Schachner, M. (1985). Pharmacological properties of gamma-aminobutyric acid-,  
860 glutamate-, and aspartate-induced depolarizations in cultured astrocytes. *J Neurosci* 5, 3295-3301.

861 Khirug, S., Yamada, J., Afzalov, R., Voipio, J., Khiroug, L., and Kaila, K. (2008). GABAergic  
862 depolarization of the axon initial segment in cortical principal neurons is caused by the Na-K-2Cl  
863 cotransporter NKCC1. *J Neurosci* 28, 4635-4639.

864 Koncz, C., and Daugirdas, J. (1994). Use of MQAE for measurement of intracellular [Cl<sup>-</sup>] in cultured  
865 aortic smooth muscle cells. *American Journal of Physiology* Dec, H2114-2123.

866 Kovalchuk, Y., and Garaschuk, O. (2012). Two-photon chloride imaging using MQAE in vitro and in  
867 vivo. *Cold Spring Harbor protocols* 2012, 778-785.

868 Kuner, T., and Augustine, G.J. (2000). A genetically encoded ratiometric indicator for chloride: capturing  
869 chloride transients in cultured hippocampal neurons. *Neuron* 27, 447-459.

870 Kwon, T., Sakamoto, M., Peterka, D.S., and Yuste, R. (2017). Attenuation of Synaptic Potentials in  
871 Dendritic Spines. *Cell reports* 20, 1100-1110.

872 Lipton, P. (1999). Ischemic cell death in brain neurons. *Physiol Rev* 79, 1431-1568.

873 Lloyd, W.R., Wilson, R.H., Chang, C.W., Gillispie, G.D., and Mycek, M.A. (2010). Instrumentation to  
874 rapidly acquire fluorescence wavelength-time matrices of biological tissues. *Biomed Opt Express* 1, 574-  
875 586.

876 Lombardi, A., Jedlicka, P., Luhmann, H.J., and Kilb, W. (2019). Interactions between Membrane  
877 Resistance, GABA-A Receptor Properties, Bicarbonate Dynamics and Cl<sup>-</sup>-Transport Shape Activity-  
878 Dependent Changes of Intracellular Cl<sup>-</sup> Concentration. *Int J Mol Sci* 20.

879 MacVicar, B.A., Tse, F.W., Crichton, S.A., and Kettenmann, H. (1989). GABA-activated Cl<sup>-</sup> channels in  
880 astrocytes of hippocampal slices. *J Neurosci* 9, 3577-3583.

881 Marandi, N., Konnerth, A., and Garaschuk, O. (2002). Two-photon chloride imaging in neurons of brain  
882 slices. *Pflugers Archiv : European journal of physiology* 445, 357-365.

883 Mohapatra, N., Tonnesen, J., Vlachos, A., Kuner, T., Deller, T., Nagerl, U.V., Santamaria, F., and  
884 Jedlicka, P. (2016). Spines slow down dendritic chloride diffusion and affect short-term ionic plasticity of  
885 GABAergic inhibition. *Sci Rep* 6, 23196.

886 Moore, Y.E., Conway, L.C., Wobst, H.J., Brandon, N.J., Deeb, T.Z., and Moss, S.J. (2019).  
887 Developmental Regulation of KCC2 Phosphorylation Has Long-Term Impacts on Cognitive Function.  
888 *Frontiers in molecular neuroscience* 12, 173.

889 Moore, Y.E., Deeb, T.Z., Chadchankar, H., Brandon, N.J., and Moss, S.J. (2018). Potentiating KCC2  
890 activity is sufficient to limit the onset and severity of seizures. *Proc Natl Acad Sci U S A* 115, 10166-  
891 10171.

892 Mukhtarov, M., Liguori, L., Waseem, T., Rocca, F., Buldakova, S., Arosio, D., and Bregestovski, P.  
893 (2013). Calibration and functional analysis of three genetically encoded Cl<sup>-</sup>/pH sensors. *Frontiers in*  
894 *molecular neuroscience* 6, 9.

895 Murphy, T.H., Li, P., Betts, K., and Liu, R. (2008). Two-photon imaging of stroke onset in vivo reveals  
896 that NMDA-receptor independent ischemic depolarization is the major cause of rapid reversible damage  
897 to dendrites and spines. *J Neurosci* 28, 1756-1772.

898 Nicoll, R.A., Padjen, A., and Barker, J.L. (1976). Analysis of amino acid responses on frog  
899 motoneurons. *Neuropharmacology* 15, 45-53.

900 Oheim, M., Beaurepaire, E., Chaigneau, E., Mertz, J., and Charpak, S. (2001). Two-photon microscopy in  
901 brain tissue: parameters influencing the imaging depth. *Journal of neuroscience methods* 111, 29-37.

902 Payne, J.A. (1997). Functional characterization of the neuronal-specific K-Cl cotransporter: implications  
903 for [K<sup>+</sup>]<sub>o</sub> regulation. *The American journal of physiology* 273, C1516-1525.

904 Pisella, L.I., Gaiarsa, J.L., Diabira, D., Zhang, J., Khalilov, I., Duan, J., Kahle, K.T., and Medina, I.  
905 (2019). Impaired regulation of KCC2 phosphorylation leads to neuronal network dysfunction and  
906 neurodevelopmental pathology. *Sci Signal* 12.

907 Pond, B.B., Berglund, K., Kuner, T., Feng, G., Augustine, G.J., and Schwartz-Bloom, R.D. (2006). The  
908 chloride transporter Na<sup>(+)</sup>-K<sup>(+)</sup>-Cl<sup>-</sup> cotransporter isoform-1 contributes to intracellular chloride increases  
909 after in vitro ischemia. *J Neurosci* 26, 1396-1406.

910 Rial Verde, E.M., Zayat, L., Etchenique, R., and Yuste, R. (2008). Photorelease of GABA with Visible  
911 Light Using an Inorganic Caging Group. *Frontiers in neural circuits* 2, 2.

912 Rinehart, J., Maksimova, Y.D., Tanis, J.E., Stone, K.L., Hodson, C.A., Zhang, J., Risinger, M., Pan, W.,  
913 Wu, D., Colangelo, C.M., *et al.* (2009). Sites of regulated phosphorylation that control K-Cl cotransporter  
914 activity. *Cell* 138, 525-536.

915 Rossi, D.J., Brady, J.D., and Mohr, C. (2007). Astrocyte metabolism and signaling during brain ischemia.  
916 *Nature neuroscience* 10, 1377-1386.

917 Rothman, S.M. (1985). The neurotoxicity of excitatory amino acids is produced by passive chloride  
918 influx. *J Neurosci* 5, 1483-1489.

919 Rungta, R.L., Choi, H.B., Tyson, J.R., Malik, A., Dissing-Olesen, L., Lin, P.J.C., Cain, S.M., Cullis, P.R.,  
920 Snutch, T.P., and MacVicar, B.A. (2015). The cellular mechanisms of neuronal swelling underlying  
921 cytotoxic edema. *Cell* 161, 610-621.

922 Silayeva, L., Deeb, T.Z., Hines, R.M., Kelley, M.R., Munoz, M.B., Lee, H.H., Brandon, N.J., Dunlop, J.,  
923 Maguire, J., Davies, P.A., *et al.* (2015). KCC2 activity is critical in limiting the onset and severity of  
924 status epilepticus. *Proc Natl Acad Sci U S A* 112, 3523-3528.

925 Staley, K.J., and Proctor, W.R. (1999). Modulation of mammalian dendritic GABA(A) receptor function  
926 by the kinetics of Cl<sup>-</sup> and HCO<sub>3</sub><sup>-</sup> transport. *J Physiol* 519 Pt 3, 693-712.

927 Steffensen, A.B., Sword, J., Croom, D., Kirov, S.A., and MacAulay, N. (2015). Chloride Cotransporters  
928 as a Molecular Mechanism underlying Spreading Depolarization-Induced Dendritic Beading. *J Neurosci*  
929 35, 12172-12187.

930 Su, G., Kintner, D.B., Flagella, M., Shull, G.E., and Sun, D. (2002). Astrocytes from Na<sup>(+)</sup>-K<sup>(+)</sup>-Cl<sup>(-)</sup>  
931 cotransporter-null mice exhibit absence of swelling and decrease in EAA release. *Am J Physiol Cell*  
932 *Physiol* 282, C1147-1160.

933 Sulis Sato, S., Artoni, P., Landi, S., Cozzolino, O., Parra, R., Pracucci, E., Trovato, F., Szczyrkowska, J.,  
934 Luin, S., Arosio, D., *et al.* (2017). Simultaneous two-photon imaging of intracellular chloride  
935 concentration and pH in mouse pyramidal neurons in vivo. *Proc Natl Acad Sci U S A* 114, E8770-E8779.

936 Tao, R., Li, C., Newburn, E.N., Ye, T., Lipska, B.K., Herman, M.M., Weinberger, D.R., Kleinman, J.E.,  
937 and Hyde, T.M. (2012). Transcript-specific associations of SLC12A5 (KCC2) in human prefrontal cortex  
938 with development, schizophrenia, and affective disorders. *J Neurosci* 32, 5216-5222.

939 Thompson, R.J., Jackson, M.F., Olah, M.E., Rungta, R.L., Hines, D.J., Beazely, M.A., MacDonald, J.F.,  
940 and MacVicar, B.A. (2008). Activation of pannexin-1 hemichannels augments aberrant bursting in the  
941 hippocampus. *Science* 322, 1555-1559.

942 Tsien, R.Y. (1998). The green fluorescent protein. *Annual review of biochemistry* 67, 509-544.

943 Untiet, V., Kovermann, P., Gerkau, N.J., Gensch, T., Rose, C.R., and Fahlke, C. (2017). Glutamate  
944 transporter-associated anion channels adjust intracellular chloride concentrations during glial maturation.  
945 *Glia* 65, 388-400.

946 Untiet, V., Moeller, L.M., Ibarra-Soria, X., Sanchez-Andrade, G., Stricker, M., Neuhaus, E.M., Logan,  
947 D.W., Gensch, T., and Spehr, M. (2016). Elevated Cytosolic Cl<sup>-</sup> Concentrations in Dendritic Knobs of  
948 Mouse Vomeronasal Sensory Neurons. *Chemical senses* *41*, 669-676.  
949 Verkman, A.S., Sellers, M.C., Chao, A.C., Leung, T., and Ketcham, R. (1989). Synthesis and  
950 characterization of improved chloride-sensitive fluorescent indicators for biological applications.  
951 *Analytical biochemistry* *178*, 355-361.  
952 Watanabe, M., Zhang, J., Mansuri, M.S., Duan, J., Karimy, J.K., Delpire, E., Alper, S.L., Lifton, R.P.,  
953 Fukuda, A., and Kahle, K.T. (2019). Developmentally regulated KCC2 phosphorylation is essential for  
954 dynamic GABA-mediated inhibition and survival. *Sci Signal* *12*.  
955 Weilinger, N.L., Lohman, A.W., Rakai, B.D., Ma, E.M., Bialecki, J., Maslieieva, V., Rilea, T., Bandet,  
956 M.V., Ikuta, N.T., Scott, L., *et al.* (2016). Metabotropic NMDA receptor signaling couples Src family  
957 kinases to pannexin-1 during excitotoxicity. *Nature neuroscience* *19*, 432-442.  
958 Weilinger, N.L., Tang, P.L., and Thompson, R.J. (2012). Anoxia-induced NMDA receptor activation  
959 opens pannexin channels via Src family kinases. *J Neurosci* *32*, 12579-12588.  
960 Williams, J.R., and Payne, J.A. (2004). Cation transport by the neuronal K<sup>(+)</sup>-Cl<sup>(-)</sup> cotransporter KCC2:  
961 thermodynamics and kinetics of alternate transport modes. *Am J Physiol Cell Physiol* *287*, C919-931.  
962 Williams, J.R., Sharp, J.W., Kumari, V.G., Wilson, M., and Payne, J.A. (1999). The neuron-specific K-Cl  
963 cotransporter, KCC2. Antibody development and initial characterization of the protein. *J Biol Chem* *274*,  
964 12656-12664.  
965 Williams, S.R., and Mitchell, S.J. (2008). Direct measurement of somatic voltage clamp errors in central  
966 neurons. *Nature neuroscience* *11*, 790-798.  
967 Yuste, R., and Denk, W. (1995). Dendritic spines as basic functional units of neuronal integration. *Nature*  
968 *375*, 682-684.  
969 Zhou, H.Y., Chen, S.R., Byun, H.S., Chen, H., Li, L., Han, H.D., Lopez-Berestein, G., Sood, A.K., and  
970 Pan, H.L. (2012). N-methyl-D-aspartate receptor- and calpain-mediated proteolytic cleavage of K<sup>(+)</sup>-Cl<sup>(-)</sup>-  
971 cotransporter-2 impairs spinal chloride homeostasis in neuropathic pain. *J Biol Chem* *287*, 33853-33864.  
972
